# Supplementary material for: Cyclic Peptides from the Soft Coral-Derived Fungus Aspergillus sclerotiorum SCSIO 41031
Source: MDPI journal article supplement (doi:10.3390/md19120701), 2021-12-10
Supplement: s1 [file s1]

**Sclerotides C-E and Scopularide I, New Cyclic Peptides from the Soft-Coral  
Derived Fungus *Aspergillus sclerotiorum***

Jieyi Long<sup>1,2</sup>, Yaqi Chen<sup>3</sup>, Weihao Chen<sup>1,2</sup>, Junfeng Wang<sup>1</sup>, Xuefeng Zhou<sup>1</sup>, Bing  
Yang<sup>1\*</sup>, and Yonghong Liu<sup>1,2\*</sup>

<sup>1</sup> CAS Key Laboratory of Tropical Marine Bio-resources and Ecology/Guangdong  
Key Laboratory of Marine Materia Medica/Innovation Academy of South China Sea  
Ecology and Environmental Engineering, South China Sea Institute of Oceanology,  
Chinese Academy of Sciences, Guangzhou 510301, P. R. China;

<sup>2</sup> University of Chinese Academy of Sciences, 19 Yuquan Road, Beijing 100049, P. R.  
China;

<sup>3</sup> State Key Laboratory of Chemical Oncogenomics, Key Laboratory of Chemical  
Genomics, Peking University Shenzhen Graduate School, Shenzhen, 518055 China;

## Contents

|                                                                                |    |
|--------------------------------------------------------------------------------|----|
| ITS sequence of the strain <i>Aspergillus sclerotiorum</i> SCSIO 41031 .....   | 4  |
| Figure S1. $^1\text{H}$ NMR spectrum of 1 (DMSO- $d_6$ , 700 MHz) .....        | 5  |
| Figure S2. $^{13}\text{C}$ NMR spectrum of 1 (DMSO- $d_6$ , 175 MHz) .....     | 5  |
| Figure S3. DEPT spectrum of 1 (DMSO- $d_6$ ).....                              | 6  |
| Figure S4. HSQC spectrum of 1 (DMSO- $d_6$ ) .....                             | 6  |
| Figure S5. $^1\text{H}$ - $^1\text{H}$ COSY spectrum of 1 (DMSO- $d_6$ ).....  | 7  |
| Figure S6. HMBC spectrum of 1 (DMSO- $d_6$ ) .....                             | 7  |
| Figure S7. HRESIMS spectrum of 1.....                                          | 8  |
| Figure S8. IR spectrum of 1 .....                                              | 8  |
| Figure S9. UV spectrum of 1 .....                                              | 9  |
| Figure S10. CD spectrum of 1 .....                                             | 9  |
| Figure S11. $^1\text{H}$ NMR spectrum of 2 (DMSO- $d_6$ , 700 MHz).....        | 10 |
| Figure S12. $^{13}\text{C}$ NMR spectrum of 2 (DMSO- $d_6$ , 175 MHz) .....    | 10 |
| Figure S13. DEPT spectrum of 2 (DMSO- $d_6$ ).....                             | 11 |
| Figure S14. HSQC spectrum of 2 (DMSO- $d_6$ ) .....                            | 11 |
| Figure S15. $^1\text{H}$ - $^1\text{H}$ COSY spectrum of 2 (DMSO- $d_6$ )..... | 12 |
| Figure S16. HMBC spectrum of 2 (DMSO- $d_6$ ) .....                            | 12 |
| Figure S17. HRESIMS spectrum of 2.....                                         | 13 |
| Figure S18. IR spectrum of 2.....                                              | 13 |
| Figure S19. UV spectrum of 2 .....                                             | 14 |
| Figure S20. CD spectrum of 2 .....                                             | 14 |
| Figure S21. $^1\text{H}$ NMR spectrum of 3 (DMSO- $d_6$ , 500 MHz) .....       | 15 |
| Figure S22. $^{13}\text{C}$ NMR spectrum of 3 (DMSO- $d_6$ , 125 MHz) .....    | 15 |
| Figure S23. DEPT spectrum of 3 (DMSO- $d_6$ ).....                             | 16 |
| Figure S24. HSQC spectrum of 3 (DMSO- $d_6$ ) .....                            | 16 |
| Figure S25. $^1\text{H}$ - $^1\text{H}$ COSY spectrum of 3 (DMSO- $d_6$ )..... | 17 |
| Figure S26. HMBC spectrum of 3 (DMSO- $d_6$ ) .....                            | 17 |
| Figure S27. TOCSY spectrum of 3.....                                           | 18 |
| Figure S28. HRESIMS spectrum of 3.....                                         | 18 |
| Figure S29. HRESIMS/MS fragmentation of 3.....                                 | 19 |
| Figure S30. IR spectrum of 3 .....                                             | 20 |

|                                                                                                                                     |    |
|-------------------------------------------------------------------------------------------------------------------------------------|----|
| Figure S31. UV spectrum of 3 .....                                                                                                  | 20 |
| Figure S32. CD spectrum of 3 .....                                                                                                  | 21 |
| Figure S33. <sup>1</sup> H NMR spectrum of 4 (DMSO- <i>d</i> <sub>6</sub> , 500 MHz) .....                                          | 21 |
| Figure S34. <sup>13</sup> C NMR spectrum of 4 (DMSO- <i>d</i> <sub>6</sub> , 125 MHz) .....                                         | 22 |
| Figure S35. DEPT spectrum of 4 (DMSO- <i>d</i> <sub>6</sub> ) .....                                                                 | 22 |
| Figure S36. HSQC spectrum of 4 (DMSO- <i>d</i> <sub>6</sub> ) .....                                                                 | 23 |
| Figure S37. <sup>1</sup> H- <sup>1</sup> H COSY spectrum of 4 (DMSO- <i>d</i> <sub>6</sub> ) .....                                  | 23 |
| Figure S38. HMBC spectrum of 4 (DMSO- <i>d</i> <sub>6</sub> ) .....                                                                 | 24 |
| Figure S39. NOESY spectrum of 4 (DMSO- <i>d</i> <sub>6</sub> ) .....                                                                | 25 |
| Figure S40. HRESIMS spectrum of 4 .....                                                                                             | 25 |
| Figure S41. IR spectrum of 4 .....                                                                                                  | 26 |
| Figure S42. UV spectrum of 4 .....                                                                                                  | 26 |
| Figure S43. CD spectrum of 4 .....                                                                                                  | 27 |
| Figure S44. HPLC analysis of FDAA derivatives of standard amino acids (YMC-Pack ODS-A column, 250*4.6 mmI.D., S-5 μm, 12 nm). ..... | 28 |
| Figure S45. HPLC analysis of FDAA derivatives of compound 2 and 3 (YMC-Pack ODS-A column, 250*4.6 mmI.D., S-5 μm, 12 nm) .....      | 29 |
| Table S1. Test concentration and OD value of compound 4 against AChE .....                                                          | 29 |
| Figure S46. IC <sub>50</sub> curve of compound 4 against AChE .....                                                                 | 30 |
| Table S2. Test concentration and OD value of compound 4 against HONE1-EBV and HONE1. ....                                           | 30 |
| Figure S47. IC <sub>50</sub> curve of compound 4 against HONE1-EBV and HONE1. ....                                                  | 30 |

**ITS sequence of the strain *Aspergillus sclerotiorum* SCSIO 41031**

TGCGGAAGGATCATTACTGAGTGAGGGTCCCTCGGGGCCCAACCTCCCACCCGTGTAT  
ACCGTACCTTGTTGCTTCGGCGGGGCCCGCCGCGCAAGCGGCCGCCGGGGGGGGGCGT  
CAAACCCCCCTCCCTAGGCGAGCGCCCGCCGGAGACACCAACGTGAACACTGTCTGA  
AGTTTTGTTGTCTGAGTTCGATTGTATCGCAATCAGTTAAACTTTCAACAATGGATCTC  
TTGGTTCCGGCATCGATGAAGAACGCAGCGAAATGCGATAATTAATGTGAATTGCAGAA  
TTCAGTGAATCATCGAGTCTTTGAACGCACATTGCACCCCCTGGTATTCCGGGGGGGTAT  
GCCTGTCCGAGCGTCATTGCTGCCCTCAAGCACGGCTTGTGTGTTGGGTCGTCGTCCC  
CCCGGGGACGGGGCCCGAAAGGCAGCGGCGGCACCGCGTCCGGTCCTCGAGCGTATGG  
GGCTTTGTCACCCGCTCTTGTAAGGCCCGGCCGGCGCTGGCCGACGCTGAAAAGCAACC  
AACTATTTCTCCAGGTTGACCTCGGATCAGGTAGGGATAACCGCTGAACTTAAGCATAT  
C

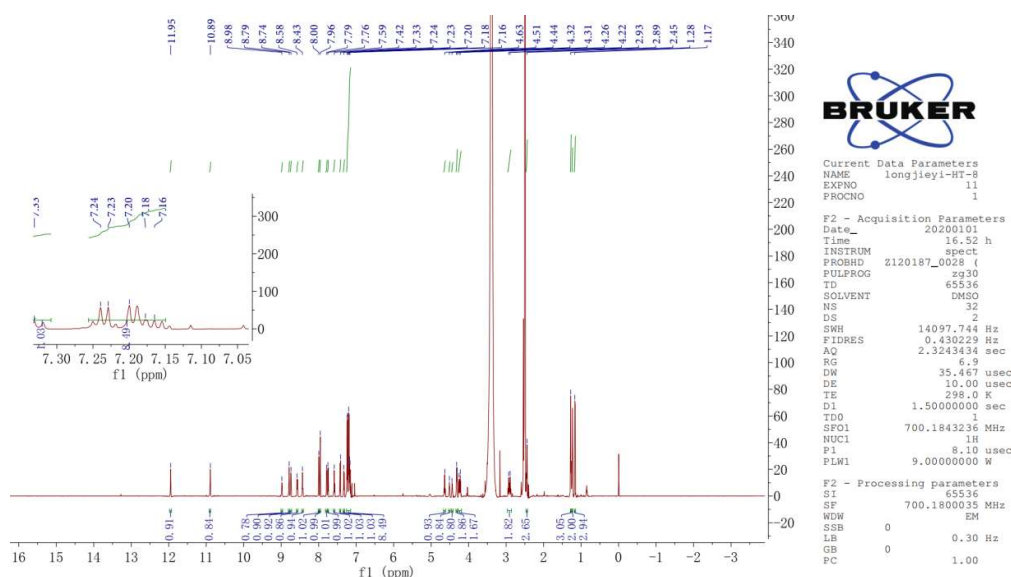

**Figure S1.**  $^1\text{H}$  NMR spectrum of **1** (DMSO- $d_6$ , 700 MHz)

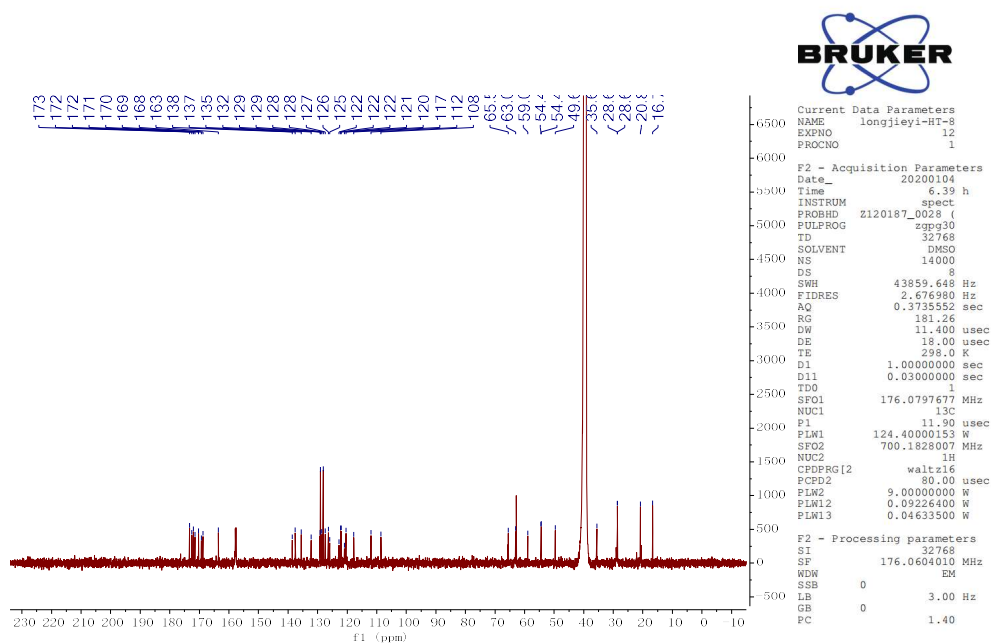

**Figure S2.**  $^{13}\text{C}$  NMR spectrum of **1** (DMSO- $d_6$ , 175 MHz)

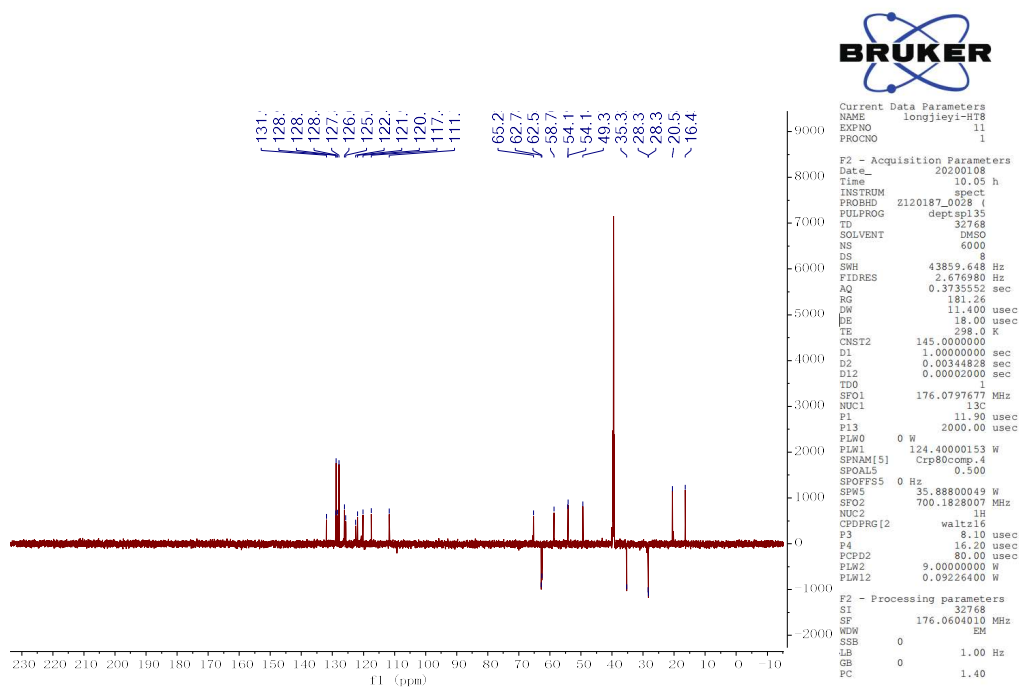

Figure S3. DEPT spectrum of **1** (DMSO- $d_6$ )

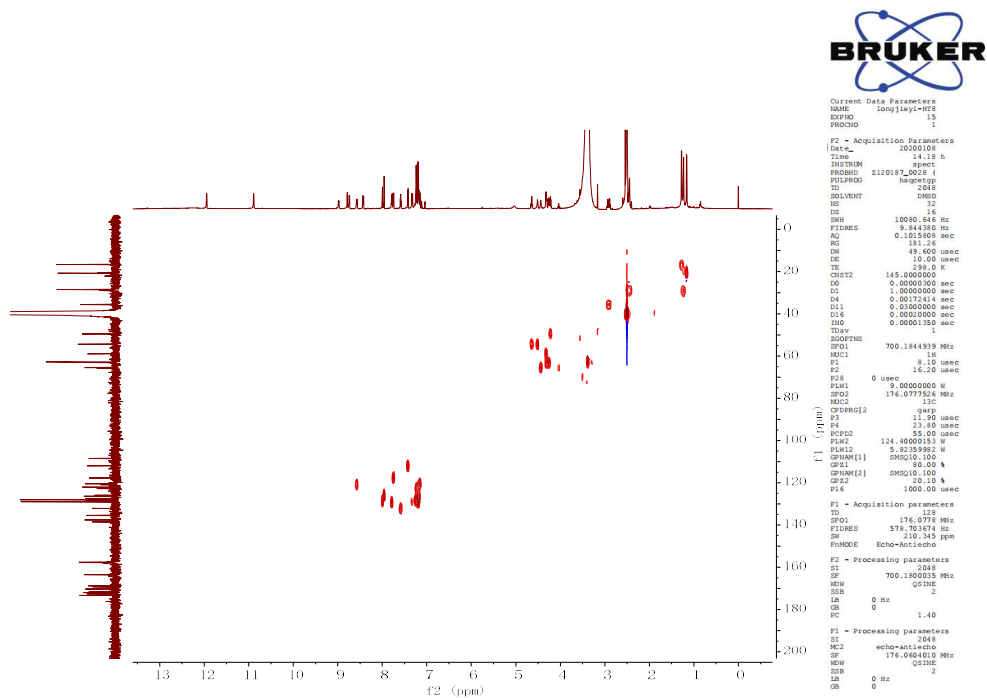

Figure S4. HSQC spectrum of **1** (DMSO- $d_6$ )

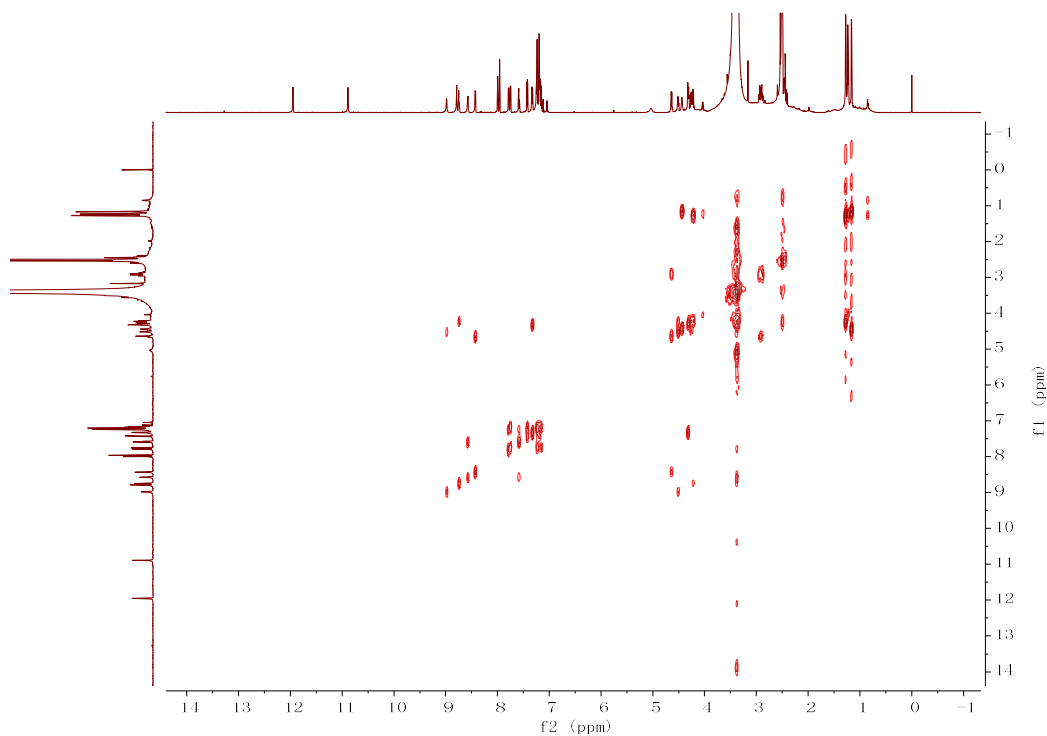

**Figure S5.**  $^1\text{H}$ - $^1\text{H}$  COSY spectrum of **1** ( $\text{DMSO}-d_6$ )

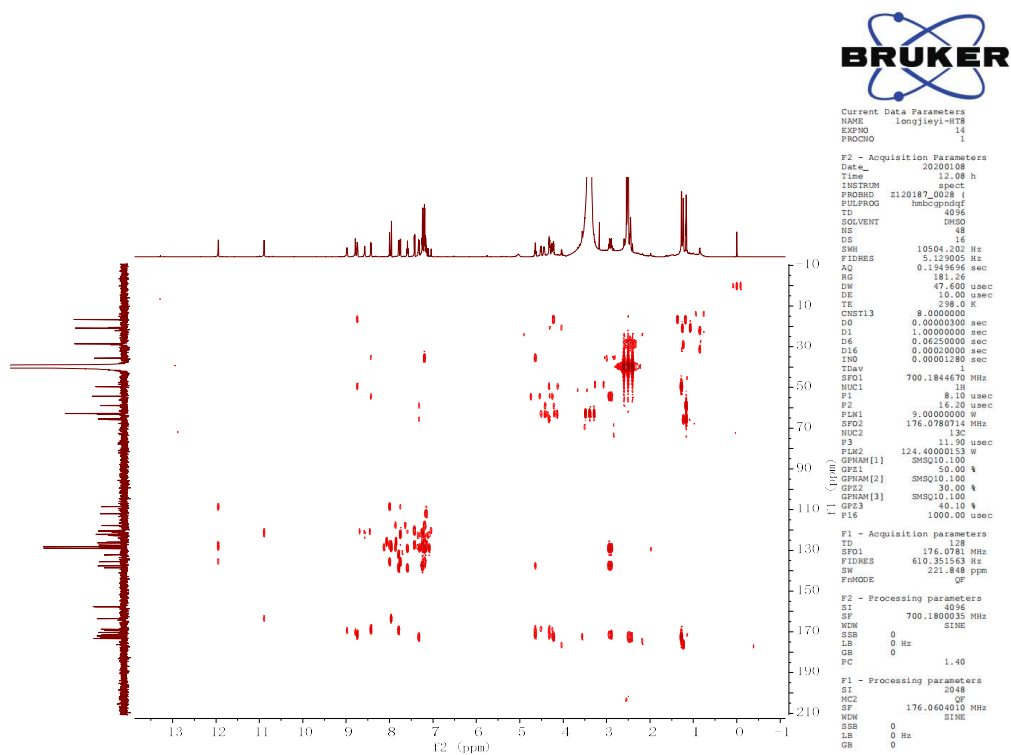

**Figure S6.** HMBC spectrum of **1** ( $\text{DMSO}-d_6$ )

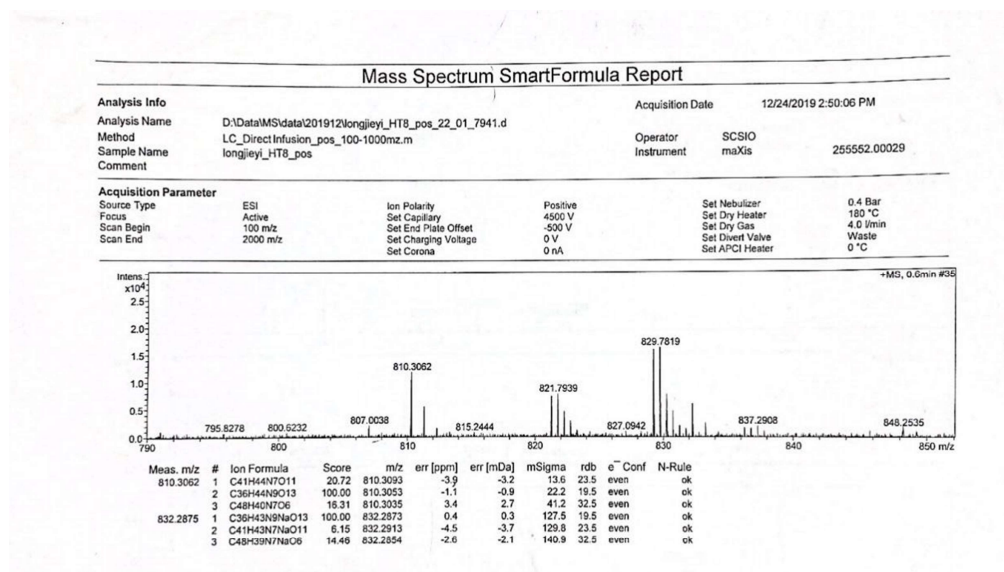

**Figure S7.** HRESIMS spectrum of **1**

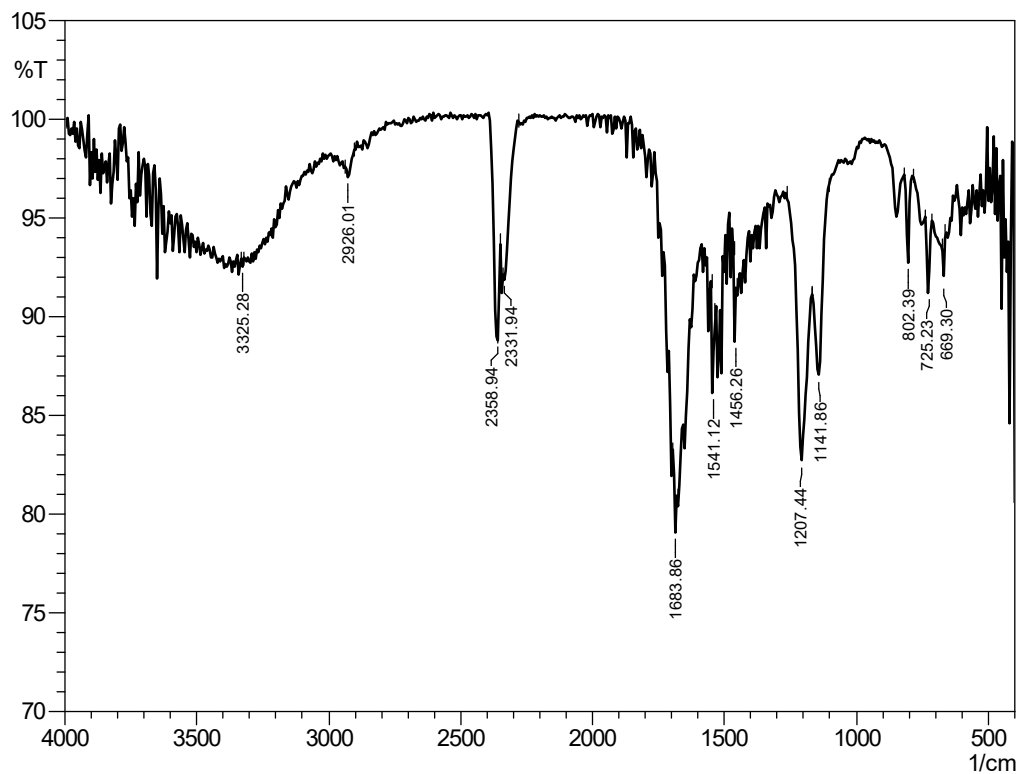

**Figure S8.** IR spectrum of **1**



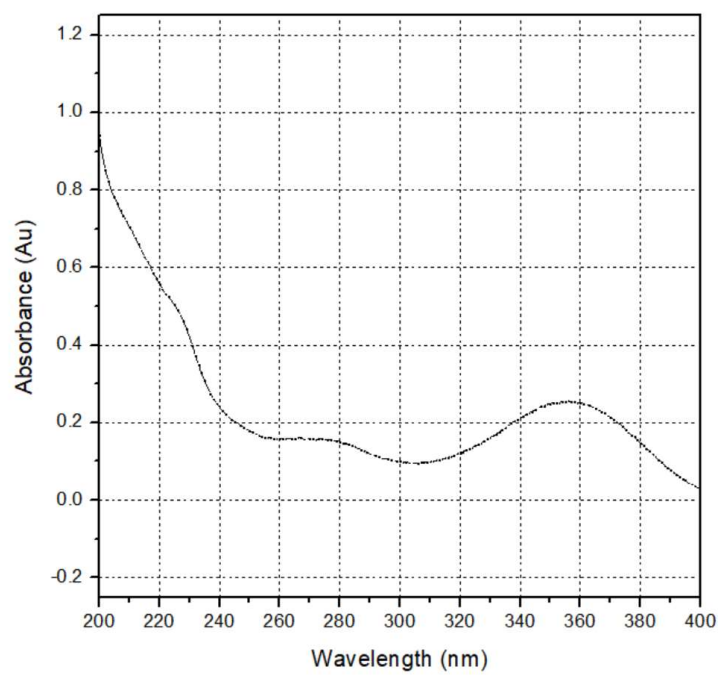

**Figure S9.** UV spectrum of **1**

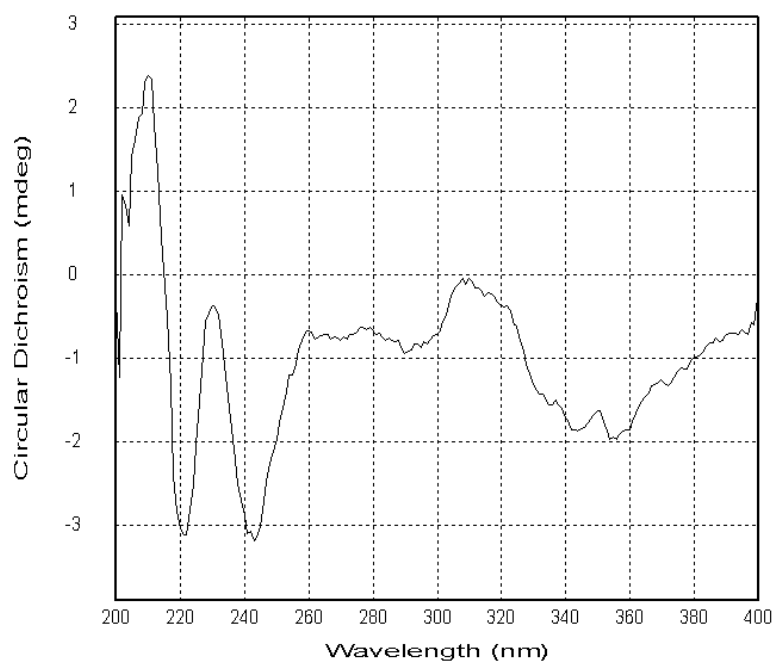

**Figure S10.** CD spectrum of **1**

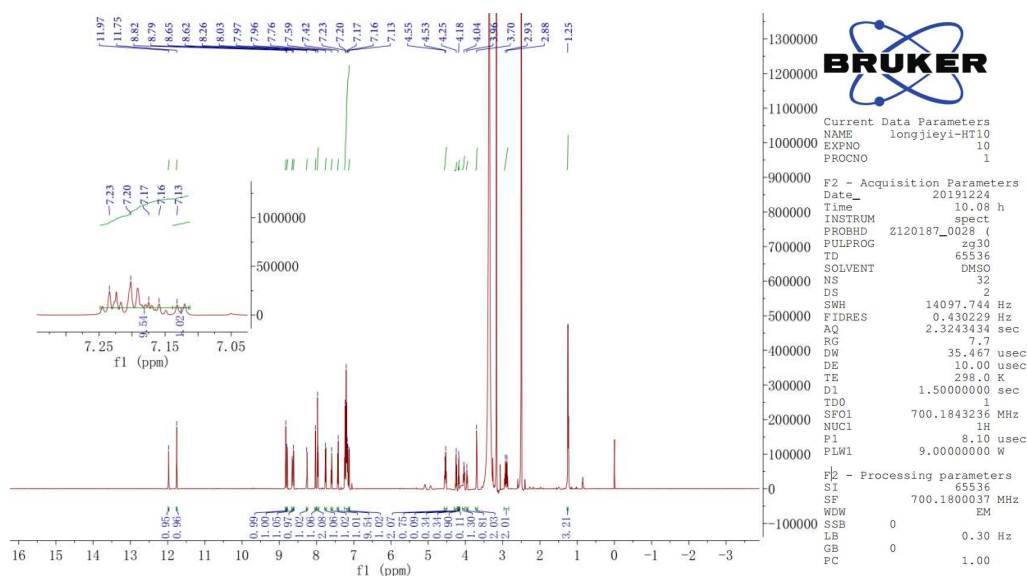

**Figure S11.**  $^1\text{H}$  NMR spectrum of **2** (DMSO- $d_6$ , 700 MHz)

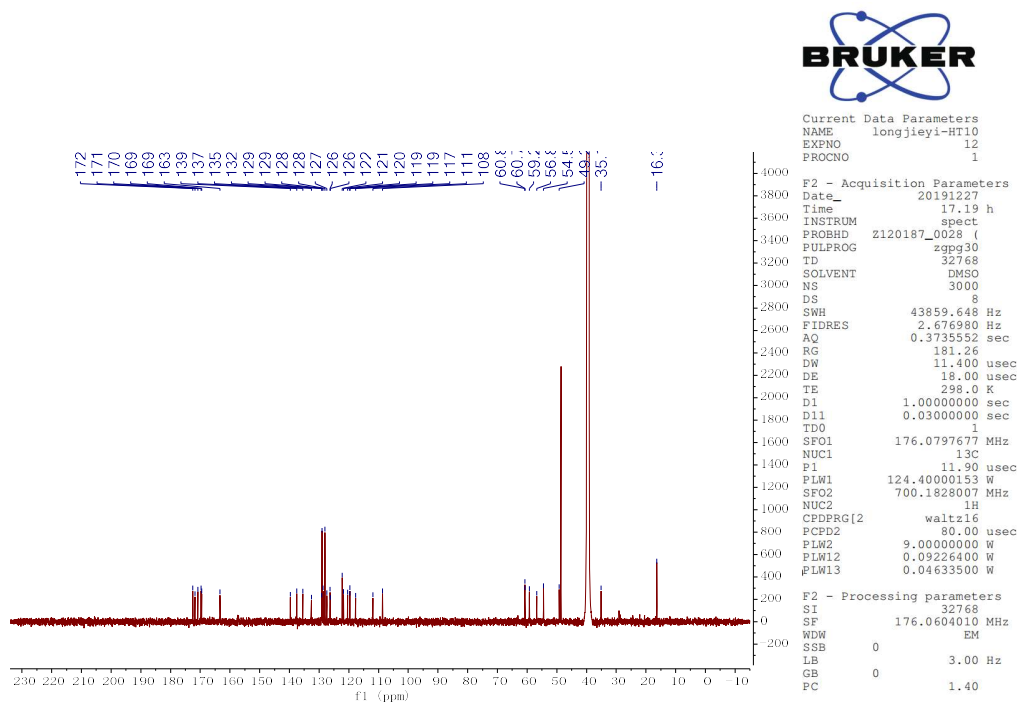

**Figure S12.**  $^{13}\text{C}$  NMR spectrum of **2** (DMSO- $d_6$ , 175 MHz)

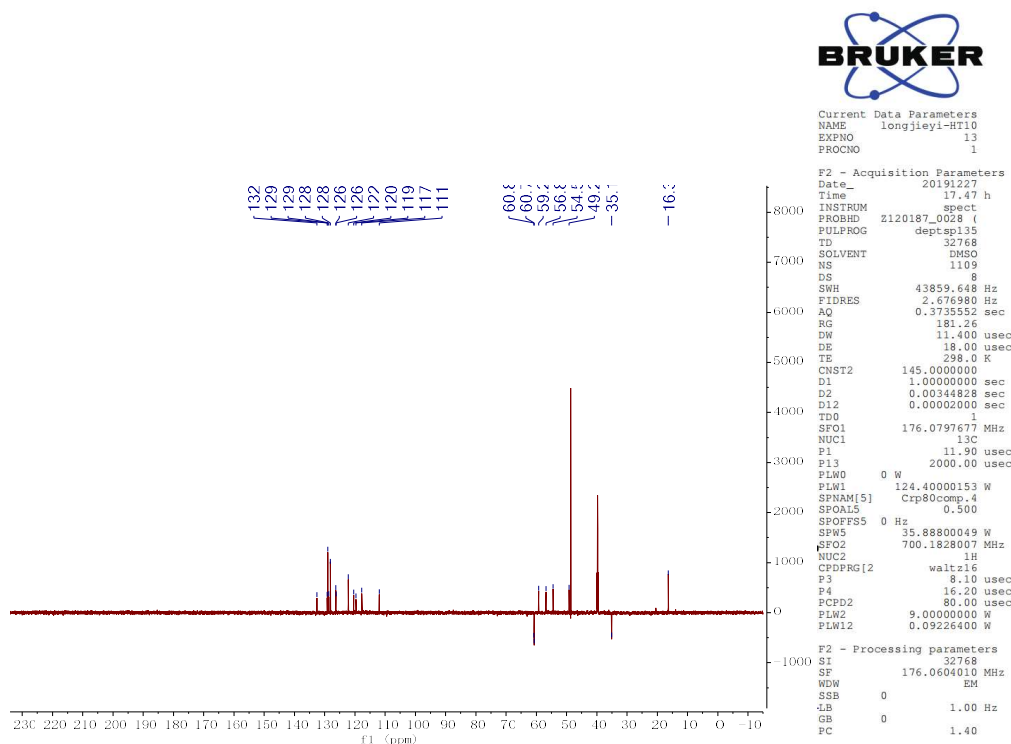

**Figure S13.** DEPT spectrum of **2** (DMSO-*d*<sub>6</sub>)

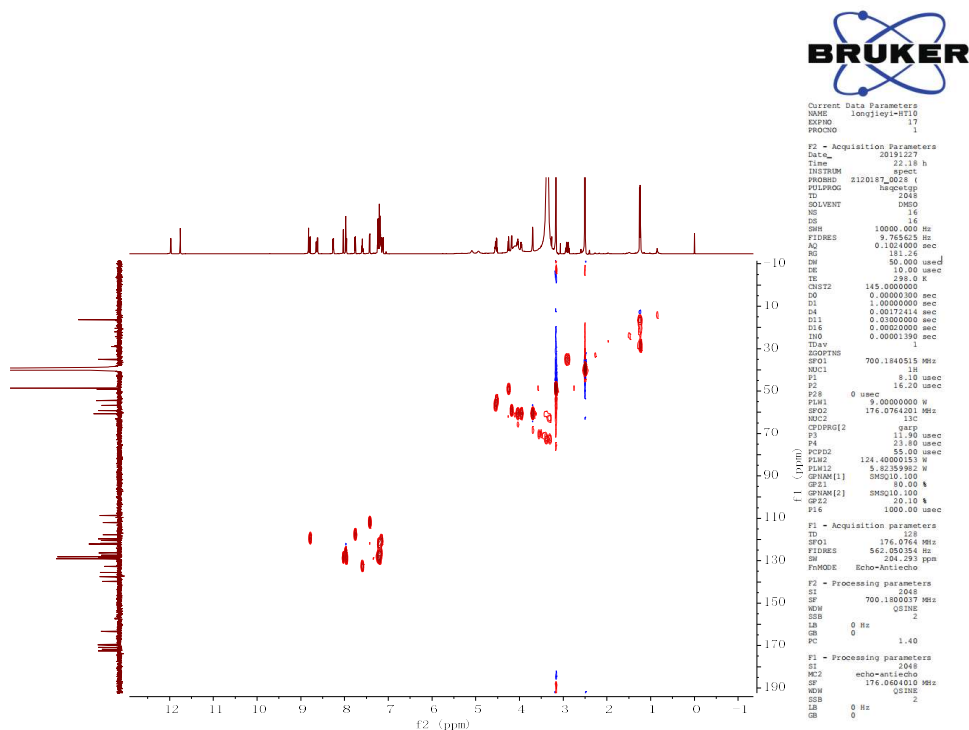

**Figure S14.** HSQC spectrum of **2** (DMSO-*d*<sub>6</sub>)

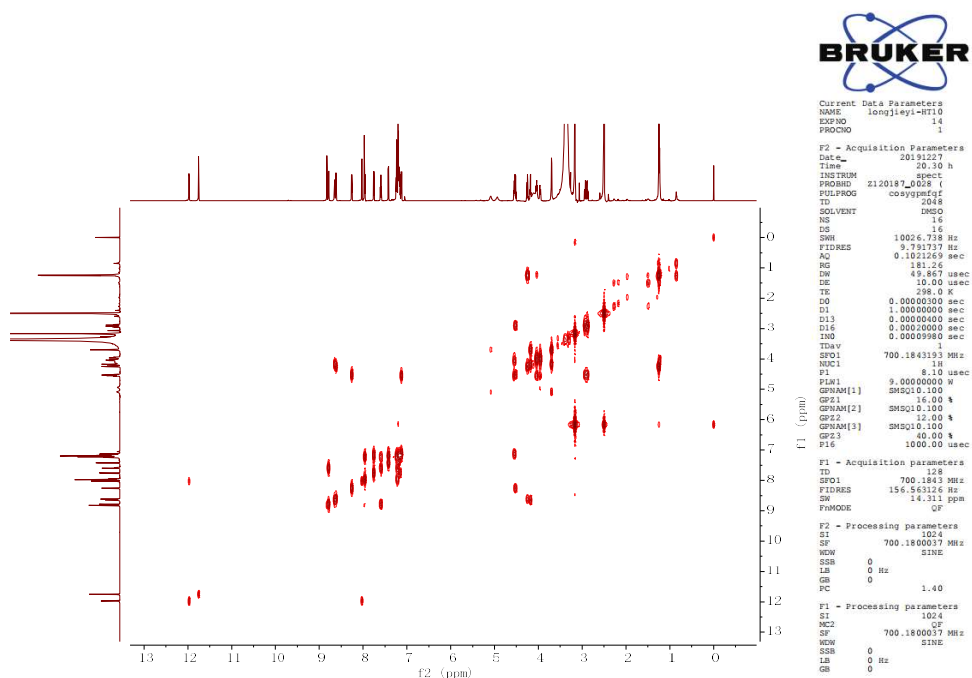

**Figure S15.**  $^1\text{H}$ - $^1\text{H}$  COSY spectrum of **2** (DMSO- $d_6$ )

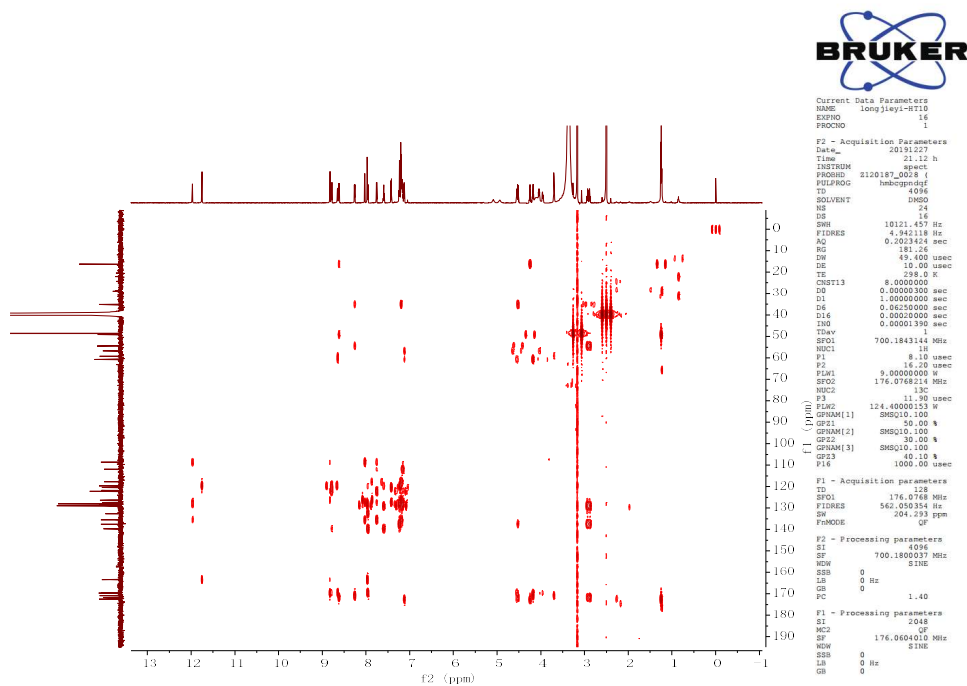

**Figure S16.** HMBC spectrum of **2** (DMSO- $d_6$ )

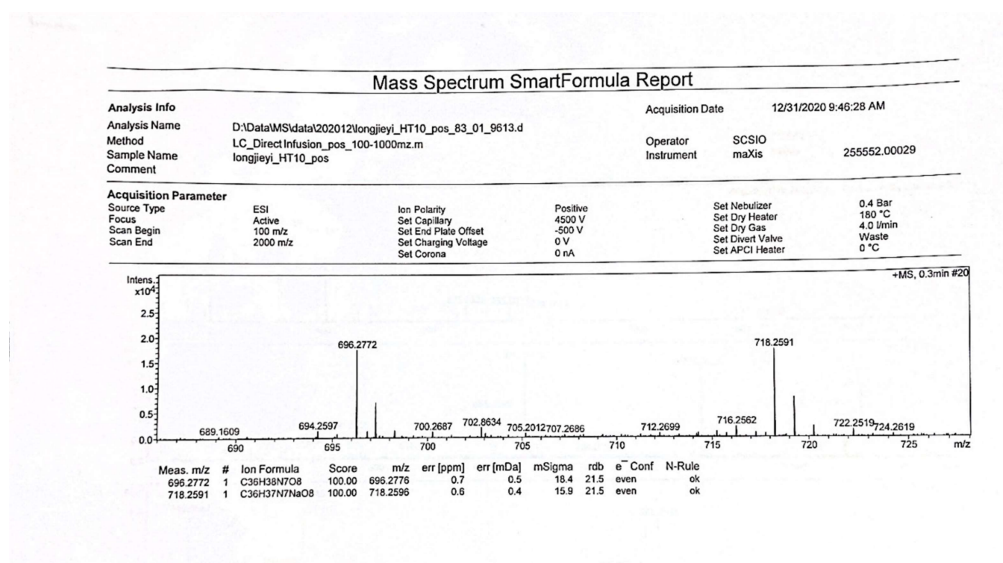

**Figure S17.** HRESIMS spectrum of **2**

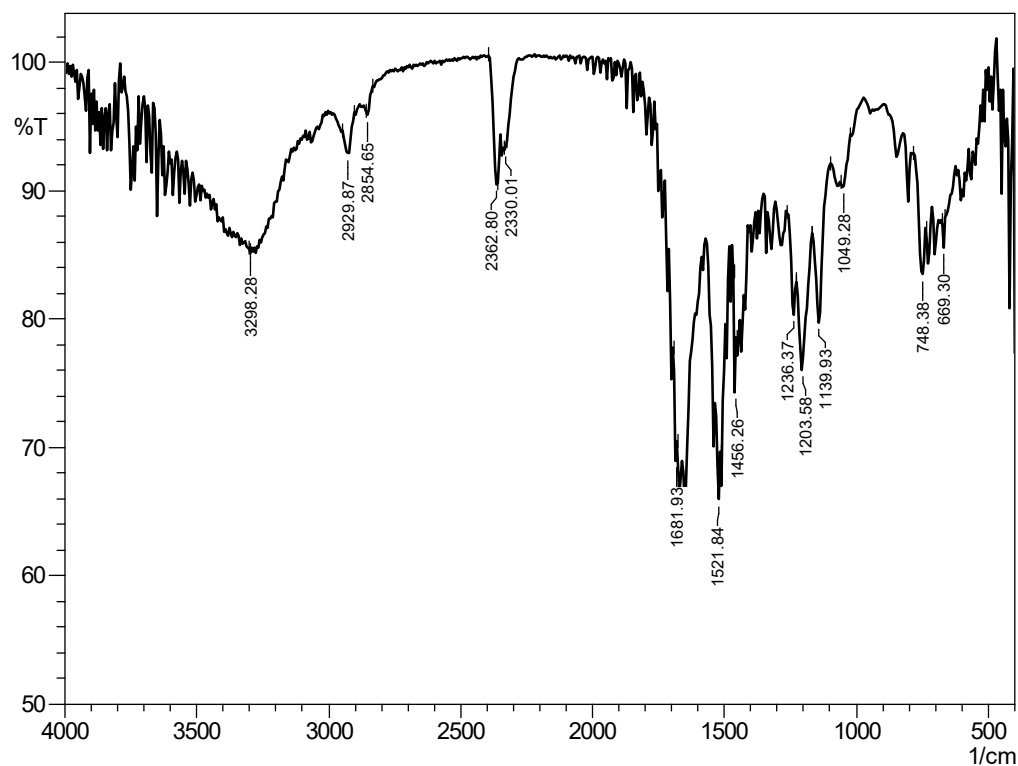

**Figure S18.** IR spectrum of **2**

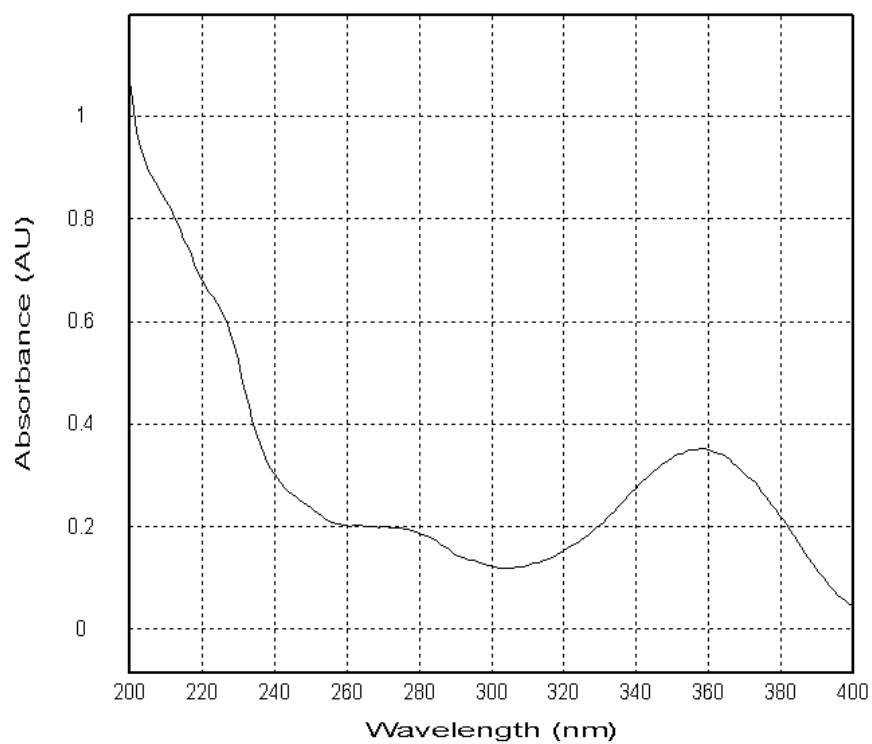

**Figure S19.** UV spectrum of **2**

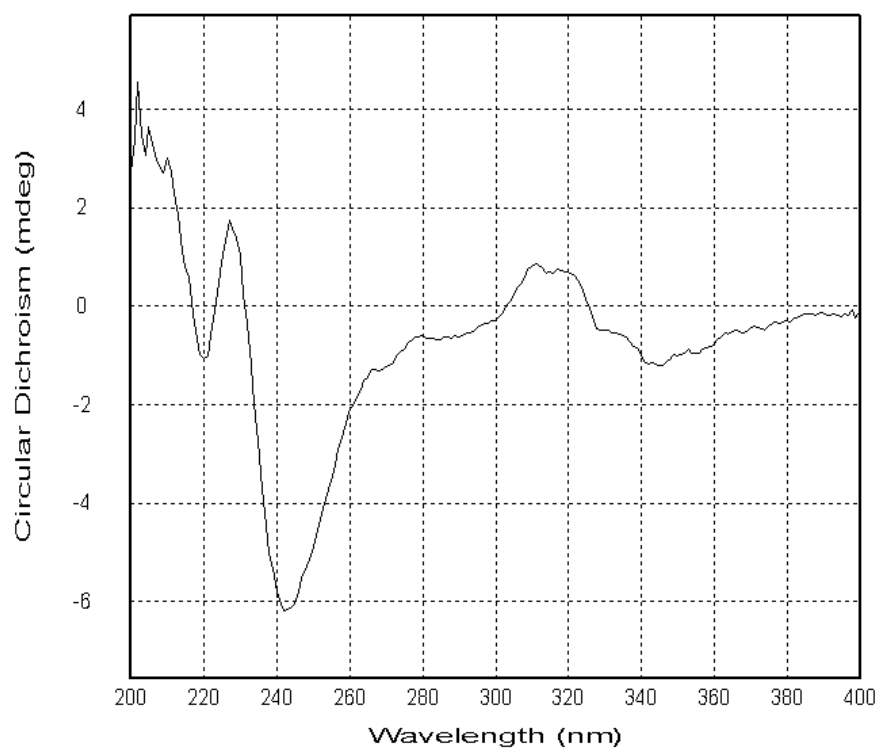

**Figure S20.** CD spectrum of **2**

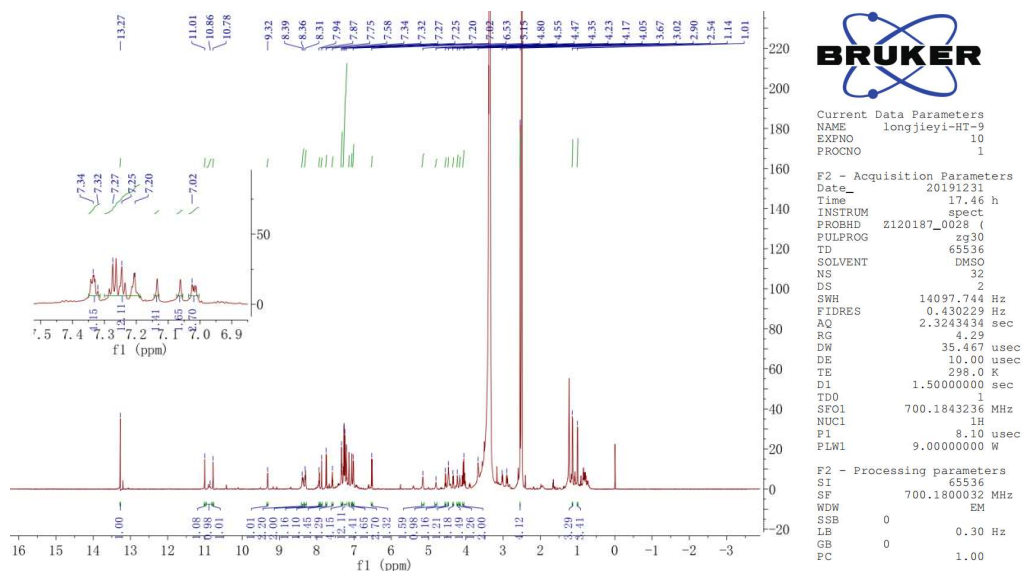

**Figure S21.**  $^1\text{H}$  NMR spectrum of **3** (DMSO- $d_6$ , 500 MHz)

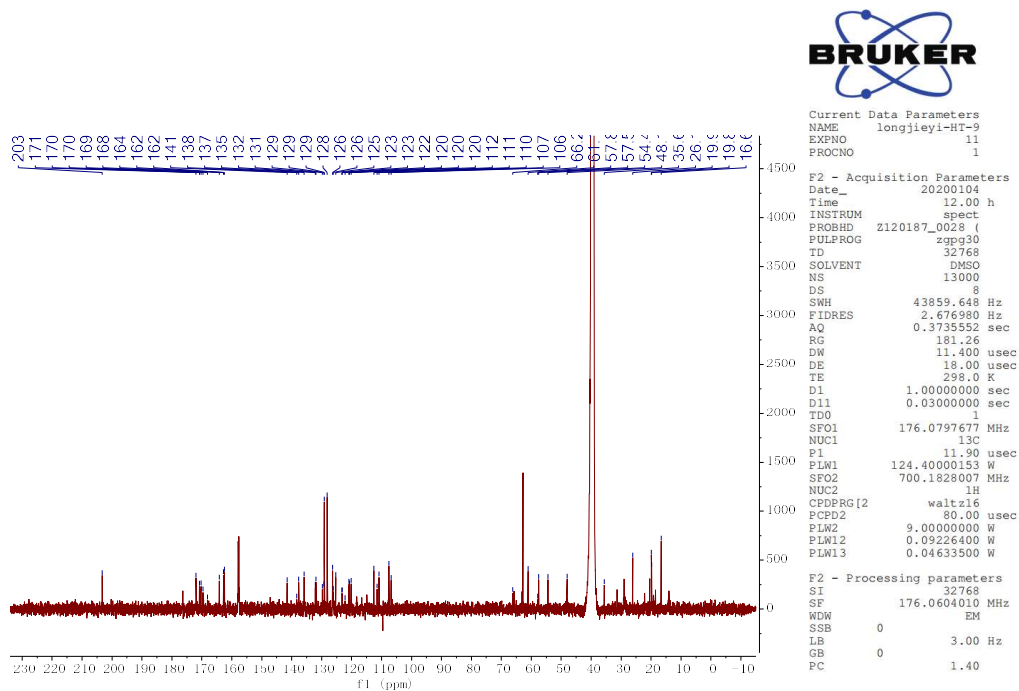

**Figure S22.**  $^{13}\text{C}$  NMR spectrum of **3** (DMSO- $d_6$ , 125 MHz)

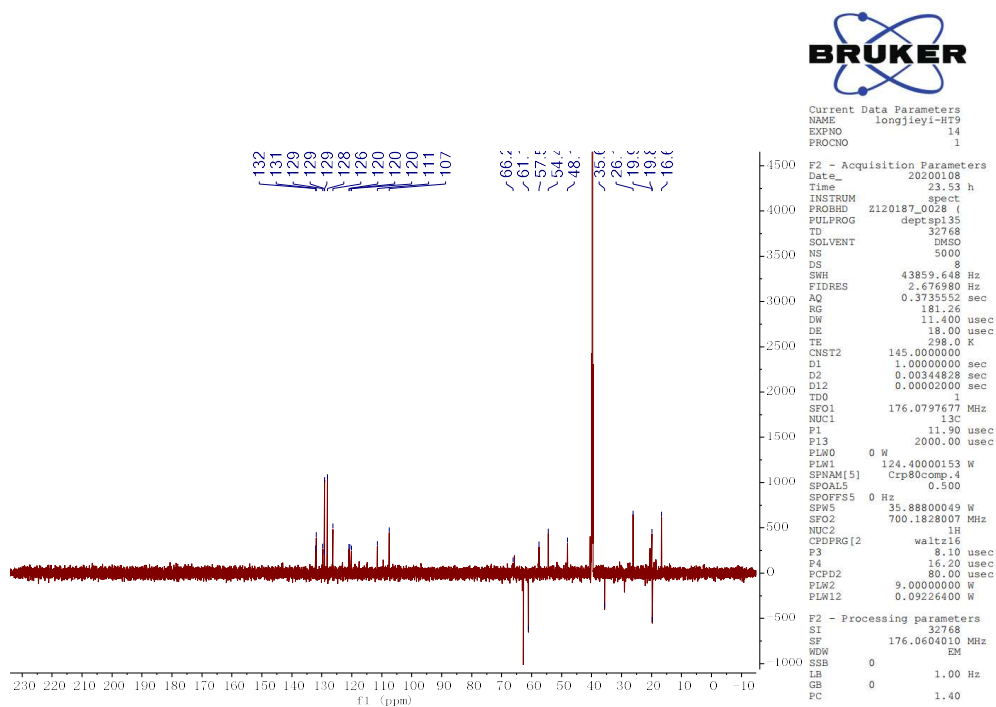

Figure S23. DEPT spectrum of **3** (DMSO- $d_6$ )

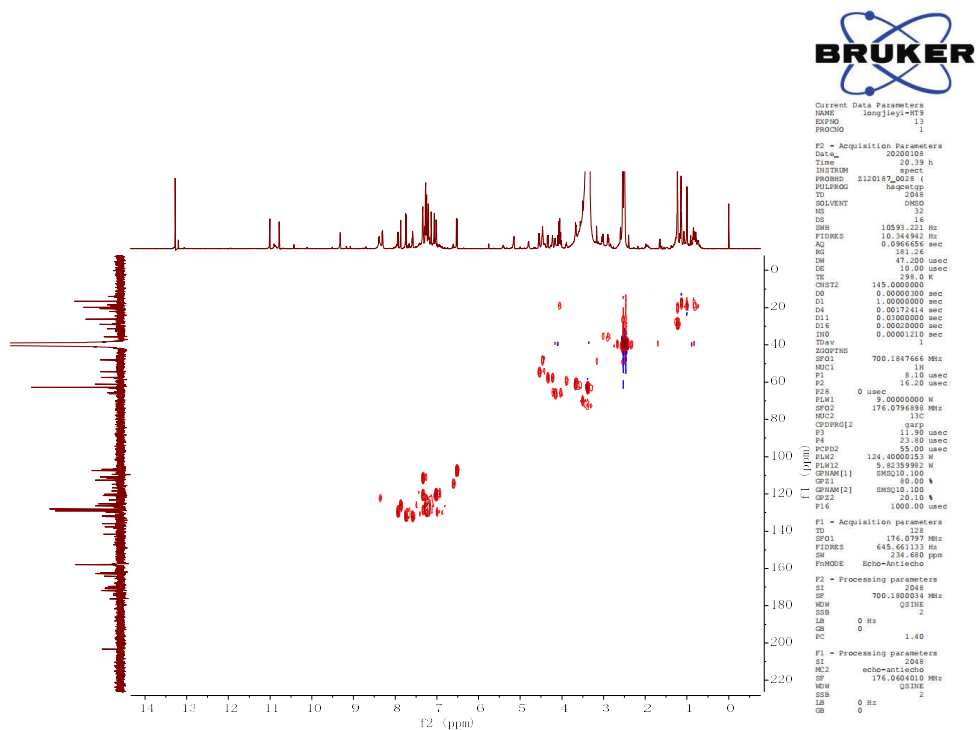

Figure S24. HSQC spectrum of **3** (DMSO- $d_6$ )



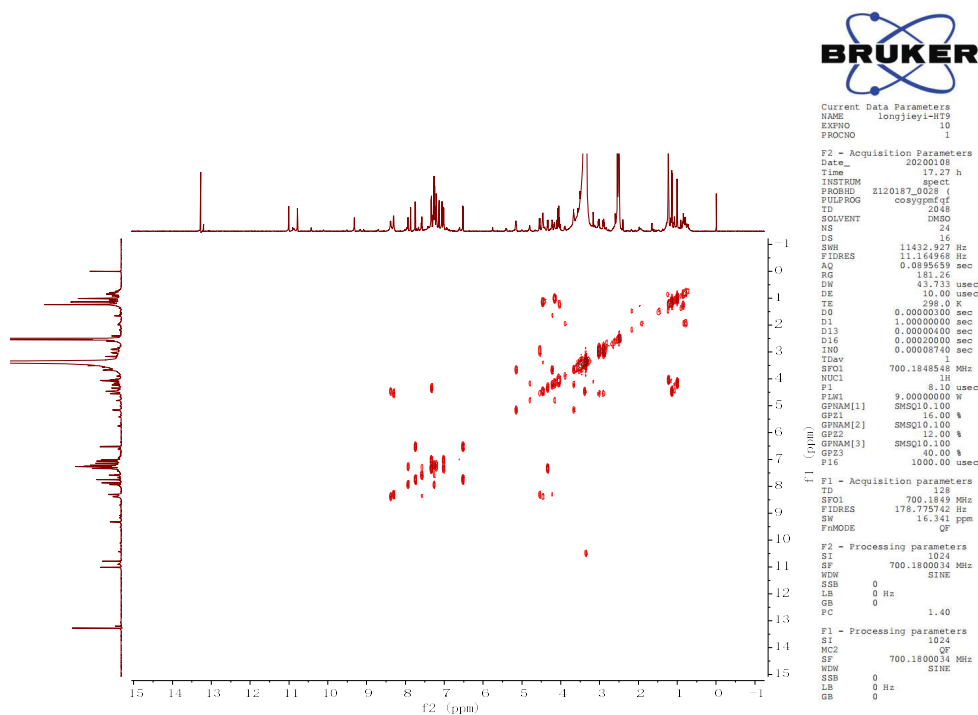

**Figure S25.**  $^1\text{H}$ - $^1\text{H}$  COSY spectrum of **3** (DMSO- $d_6$ )

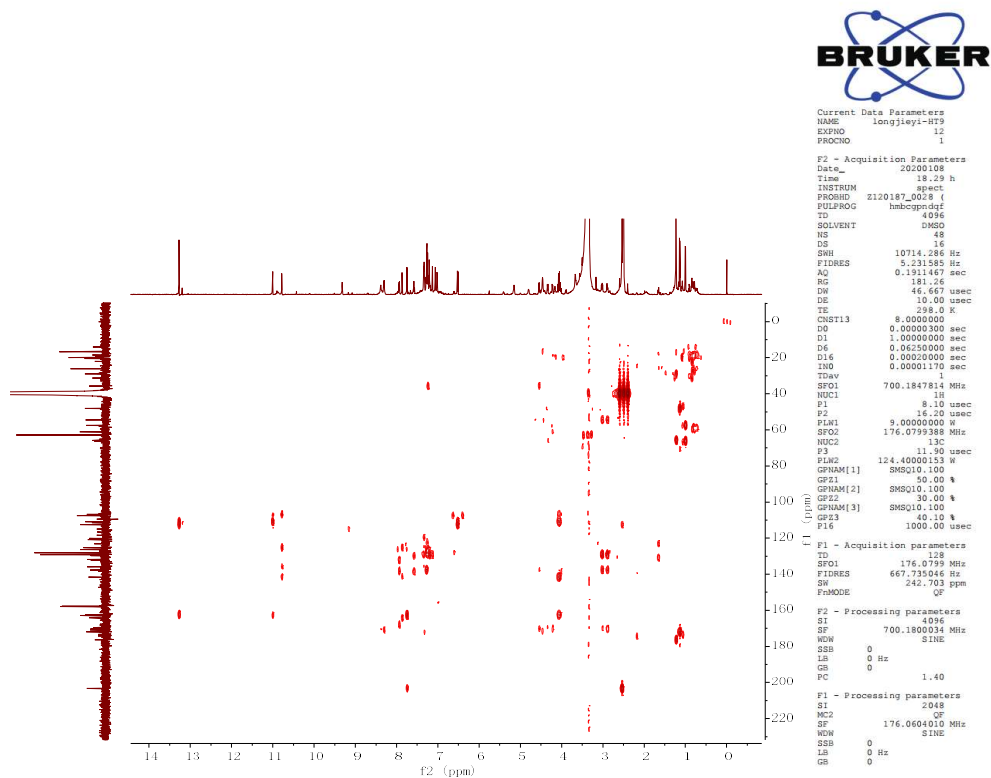

**Figure S26.** HMBC spectrum of **3** (DMSO- $d_6$ )

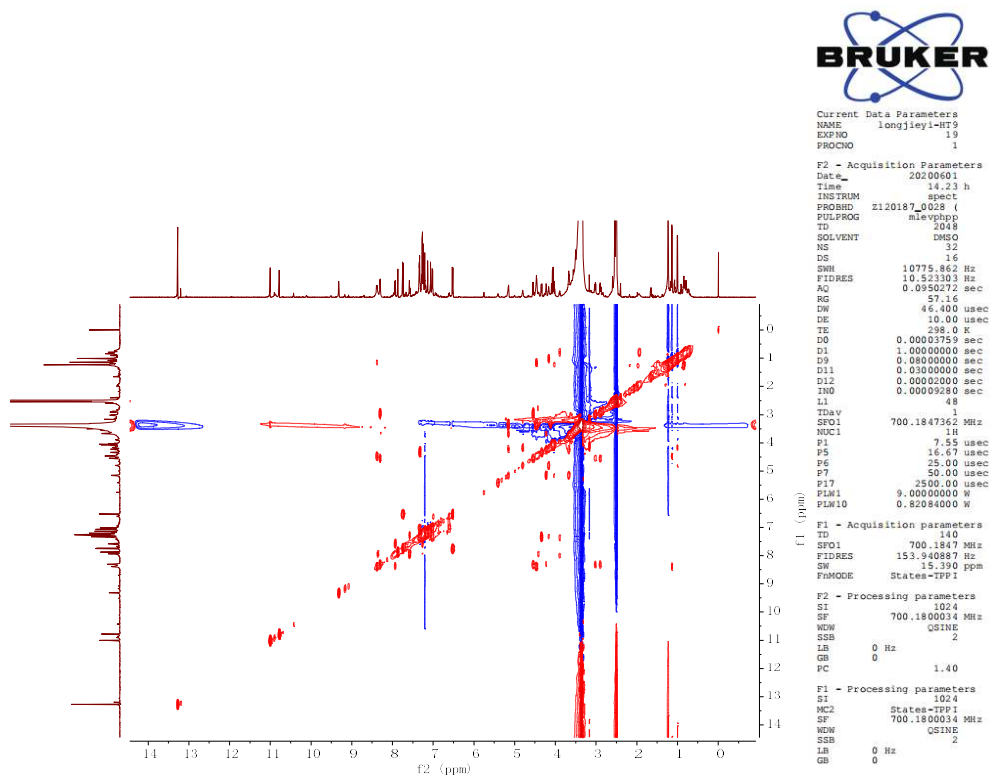

Figure S27. TOCSY spectrum of 3

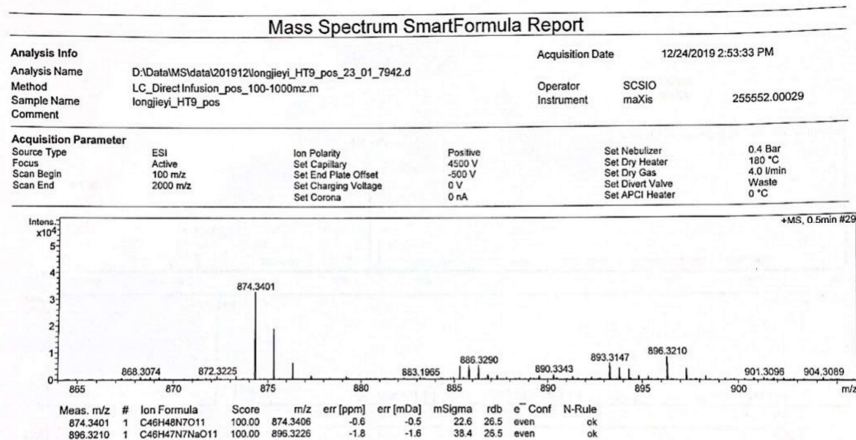

Figure S28. HRESIMS spectrum of 3

## Window Display Report

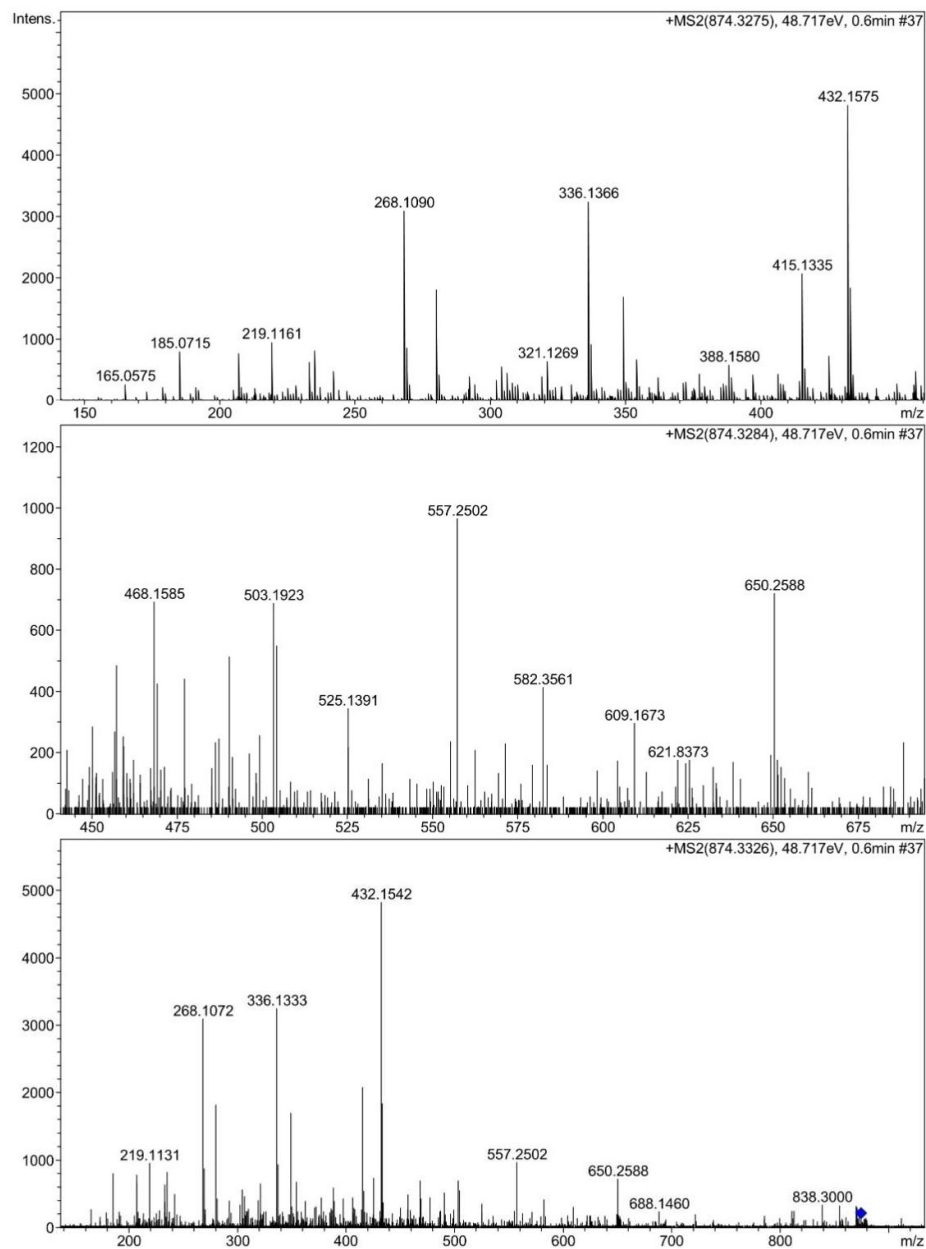

**Figure S29.** HRESIMS/MS fragmentation of **3**

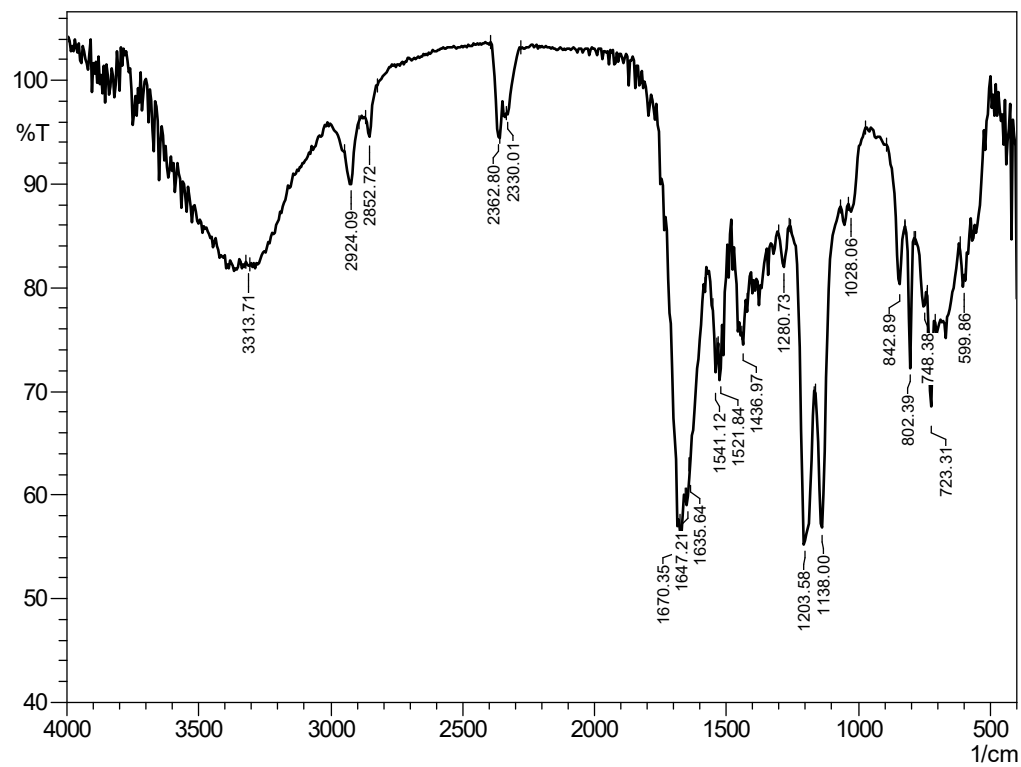

**Figure S30.** IR spectrum of **3**

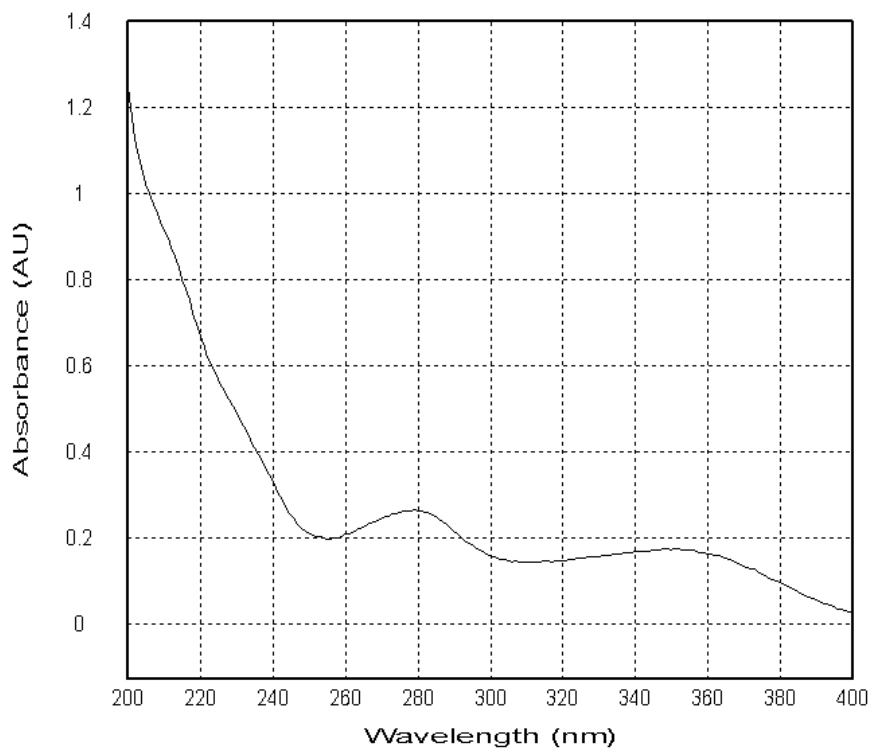

**Figure S31.** UV spectrum of **3**



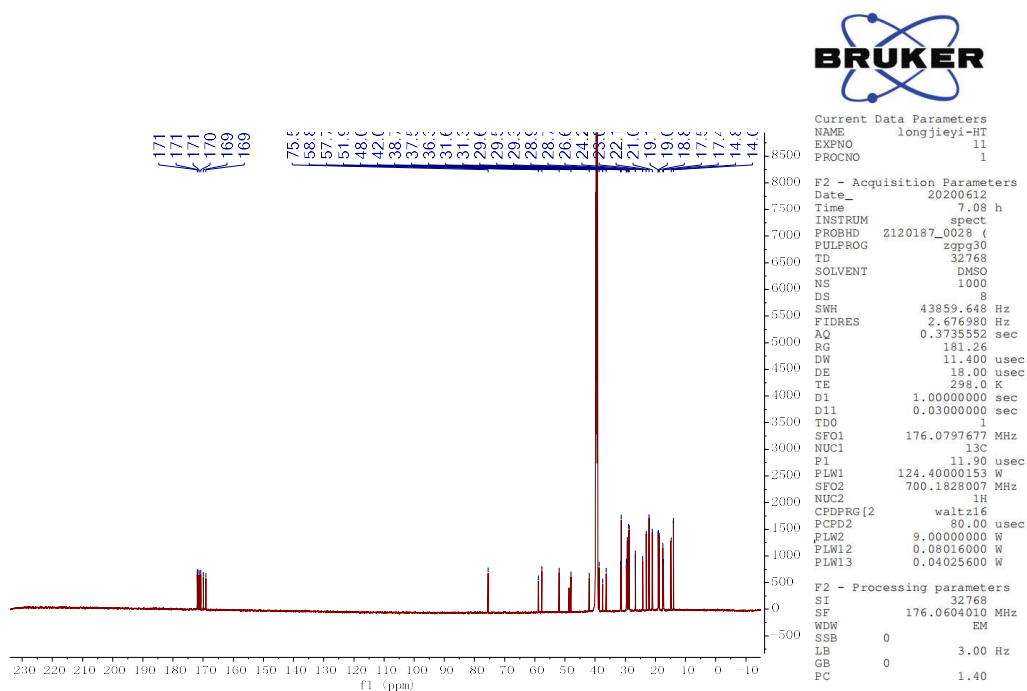

Figure S34.  $^{13}\text{C}$  NMR spectrum of **4** (DMSO- $d_6$ , 125 MHz)

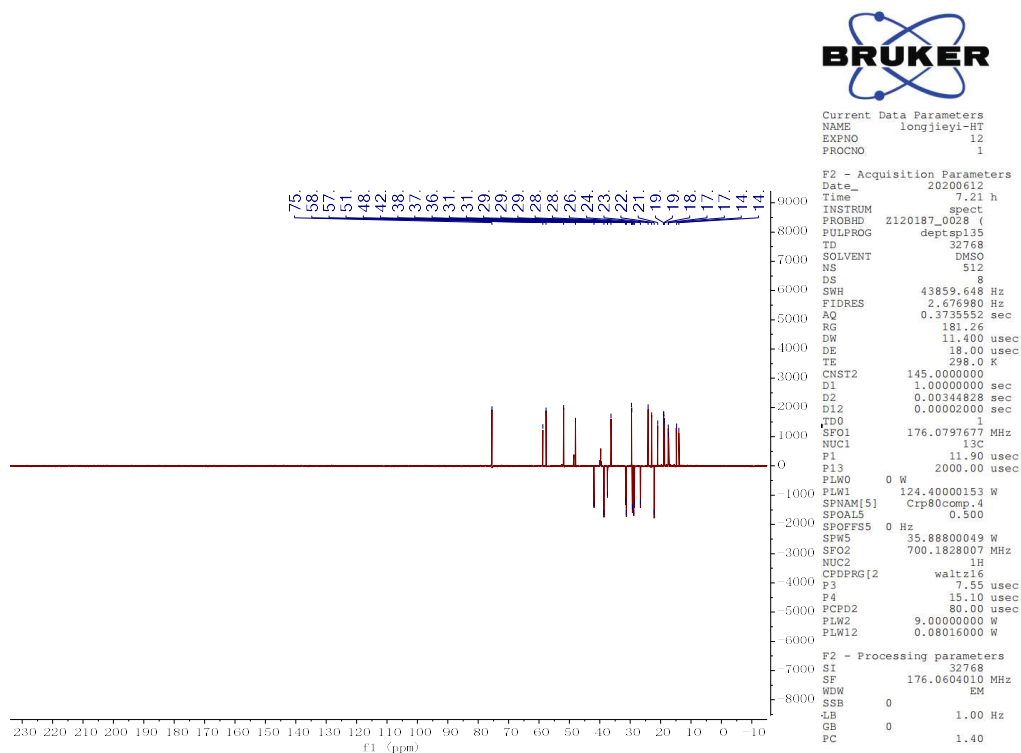

Figure S35. DEPT spectrum of **4** (DMSO- $d_6$ )

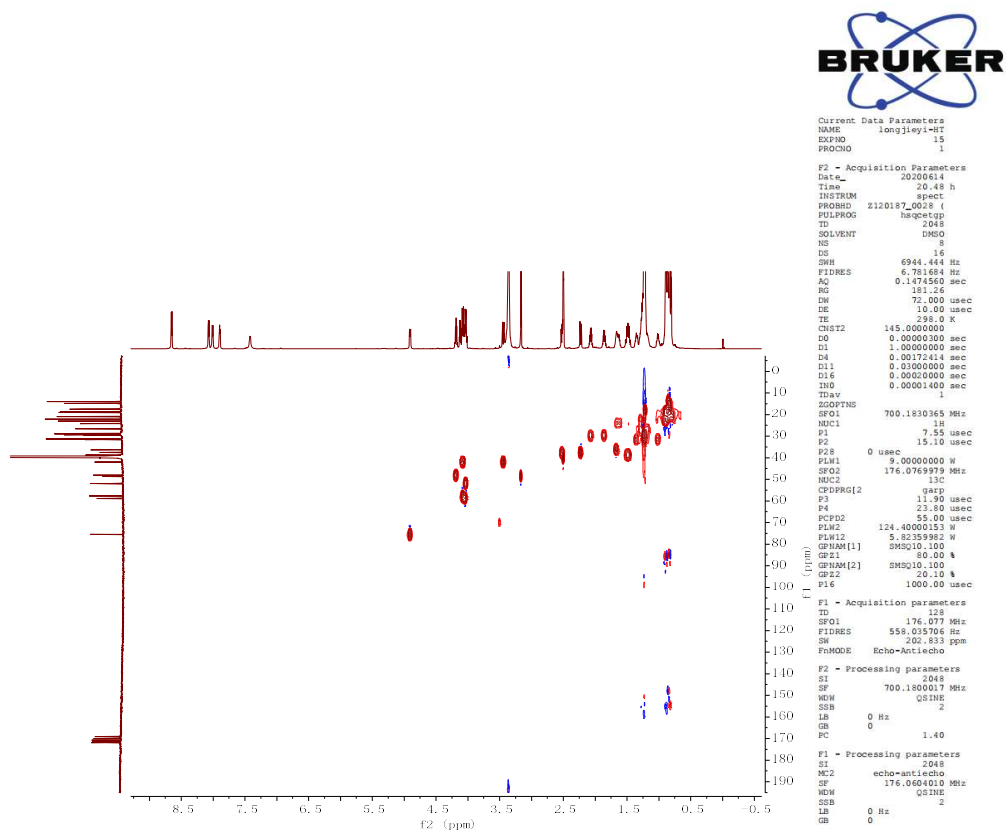

**Figure S36.** HSQC spectrum of **4** (DMSO- $d_6$ )

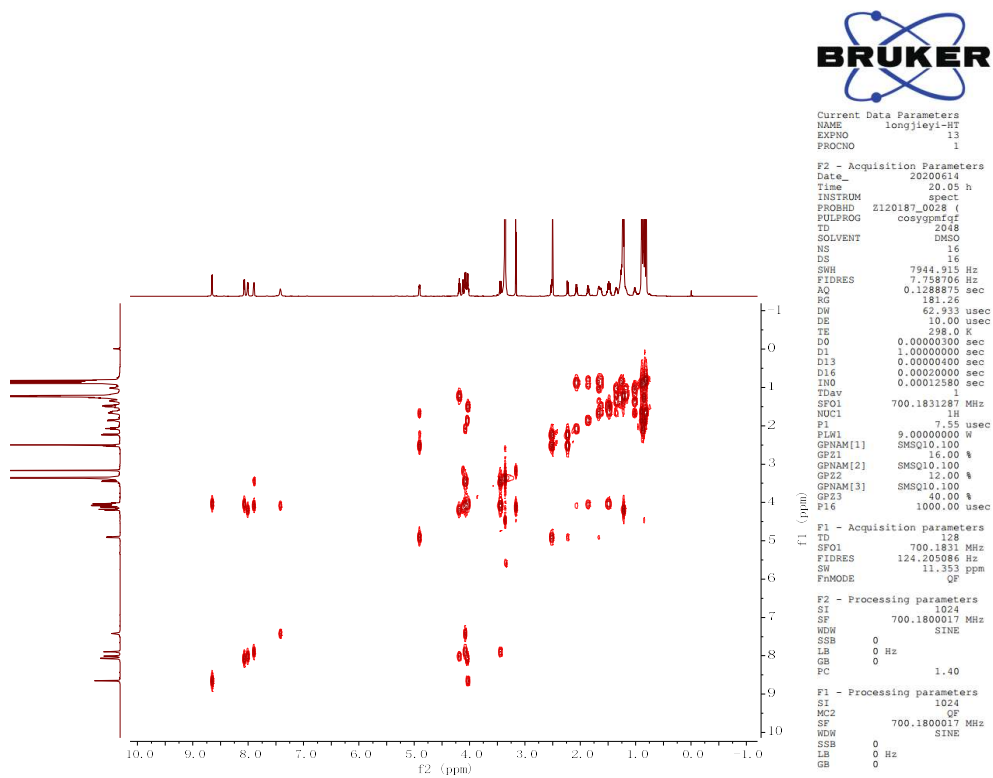

**Figure S37.**  $^1\text{H}$ - $^1\text{H}$  COSY spectrum of **4** (DMSO- $d_6$ )

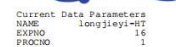

| P2 - Acquisition Parameters |                 |
|-----------------------------|-----------------|
| DATE_                       | 20020614        |
| TIME                        | 21.11 h         |
| INSTRUM                     | HRMS            |
| PROBHD                      | Z120187_0028    |
| NUCLEO1                     | hmbicqcd300     |
| PULPROG                     | zgpg30          |
| TD                          | 4096            |
| SOLVENT                     | DMSO            |
| DS                          | 16              |
| SWH                         | 7211.513 Hz     |
| FIDRES                      | 3.512529 Hz     |
| AQ                          | 0.2839893 sec   |
| RG                          | 181.26          |
| DE                          | 69.93313 usec   |
| TE                          | 300.2 usec      |
| TD0                         | 728             |
| TD1                         | 298.0 K         |
| CN1S74                      | 120.000000 sec  |
| CN1S77                      | 165.000000 sec  |
| CN1S73                      | 8.000000 sec    |
| C16                         | 0.00000000 sec  |
| T1                          | 1.00000000 sec  |
| T2                          | 0.00250000 sec  |
| T3                          | 0.00000000 sec  |
| T4                          | 0.00001460 sec  |
| FO1                         | 700.1835050 sec |
| NUC1                        | 13C             |
| NUC2                        | 1H              |
| P1                          | 7.55 usec       |
| P2                          | 15.50 usec      |
| P3                          | 97.00000000 sec |
| FO2                         | 176.076868 sec  |
| US2                         | 1.00000000 sec  |
| P4                          | 31.90 usec      |
| P5                          | 2000.00 usec    |
| P6                          | 124.000000 sec  |
| SPF07                       | Cp30comp.4      |
| SPF07                       | 0.500           |
| SPF07                       | 35.8880004 usec |
| SPF07                       | 1.00000000 sec  |
| CP1                         | 80.00 usec      |
| CP2                         | SM10.00 usec    |
| CP3                         | 140.00 usec     |
| CP4                         | 100.00 usec     |
| CP5                         | SM10.00 usec    |
| CP6                         | SM10.00 usec    |
| CP7                         | SM10.00 usec    |
| CP8                         | 100.00 usec     |
| CP9                         | 100.00 usec     |
| F1 - Acquisition parameters |                 |
| TD                          | 128             |
| FSRES                       | 726.676 Hz      |
| TDRES                       | 535.12529 Hz    |
| SW                          | 1494.99 ppm     |
| NAME                        | Ecto-Anticido   |
| P2 - Processing parameters  |                 |
| SI                          | 32768           |
| PC                          | 700.1800017 MHz |
| NUC1                        | 13C             |
| NUC2                        | 1H              |
| LB                          | 4               |
| SB                          | 0 Hz            |
| GB                          | 0               |
| PC                          | 1.40            |
| F1 - Processing parameters  |                 |
| SI                          | 1024            |
| NUC1                        | ecto-anticido   |
| NUC2                        | Q27H            |
| GB                          | 2               |
| LB                          | 0 Hz            |
| SB                          | 0               |

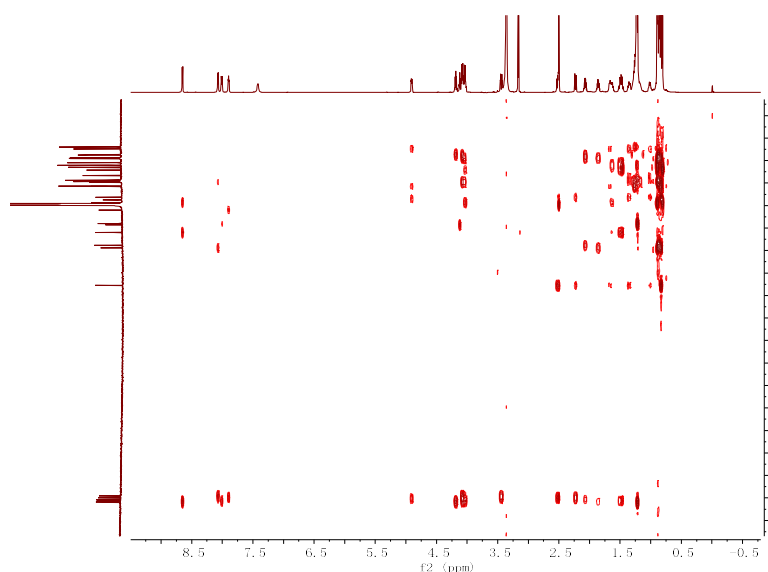

**Figure S38.** HMBC spectrum of **4** (DMSO-*d*<sub>6</sub>)



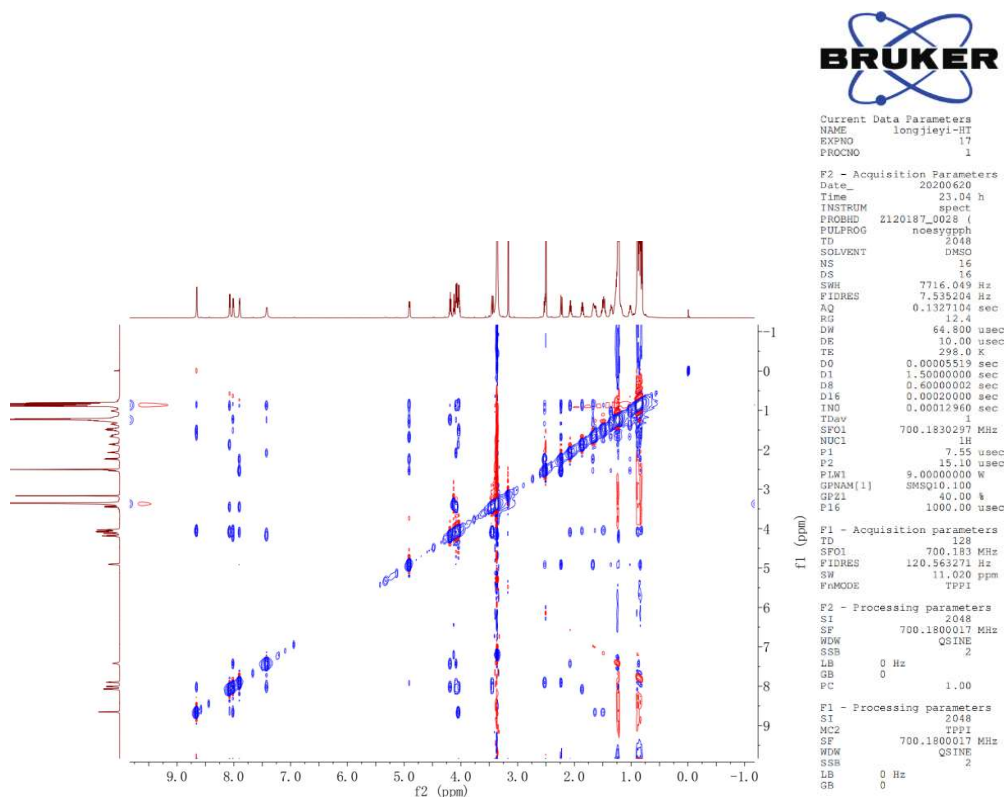

Figure S39. NOESY spectrum of **4** (DMSO- $d_6$ )

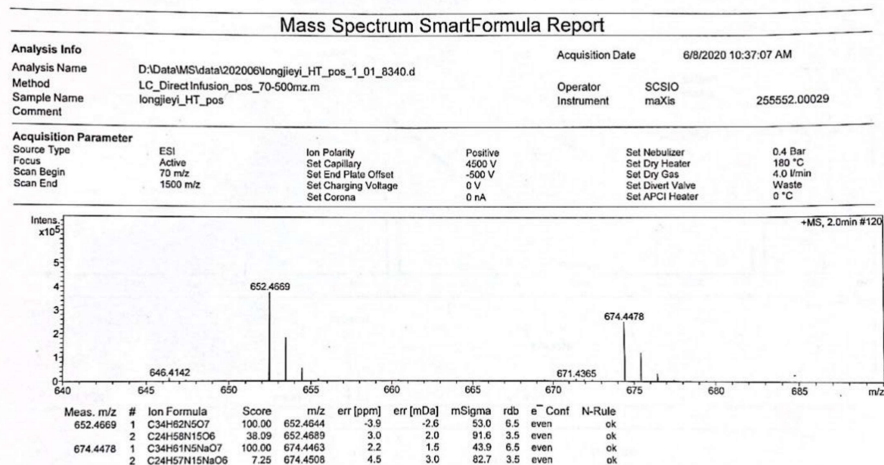

Figure S40. HRESIMS spectrum of **4**

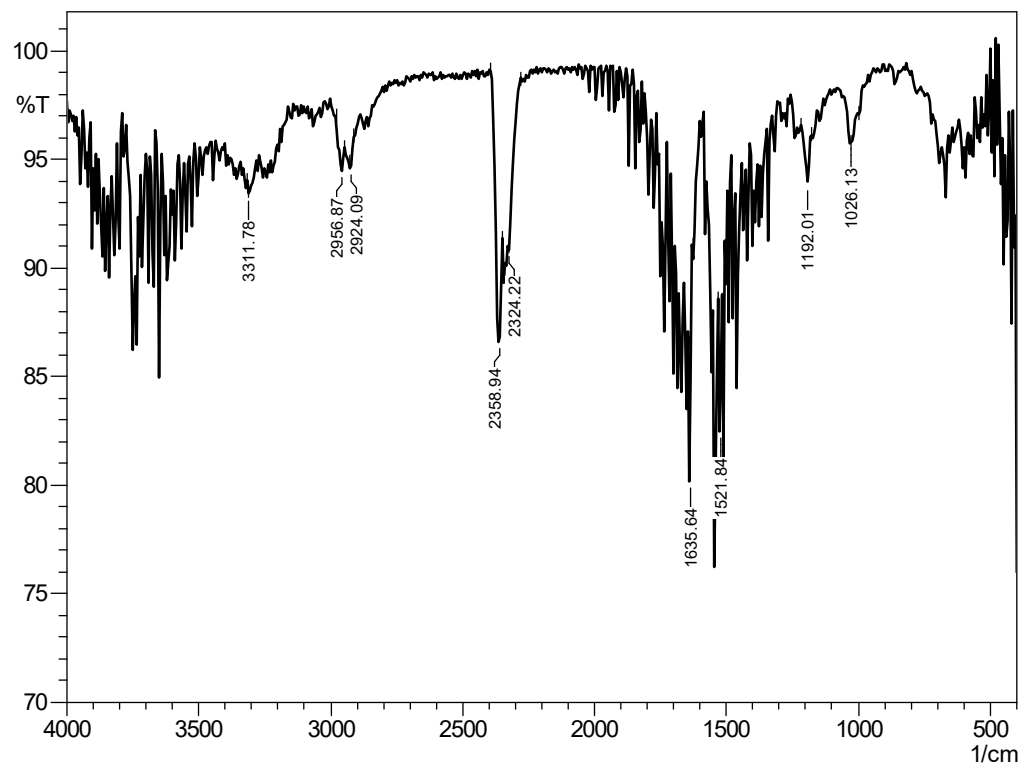

Figure S41. IR spectrum of 4

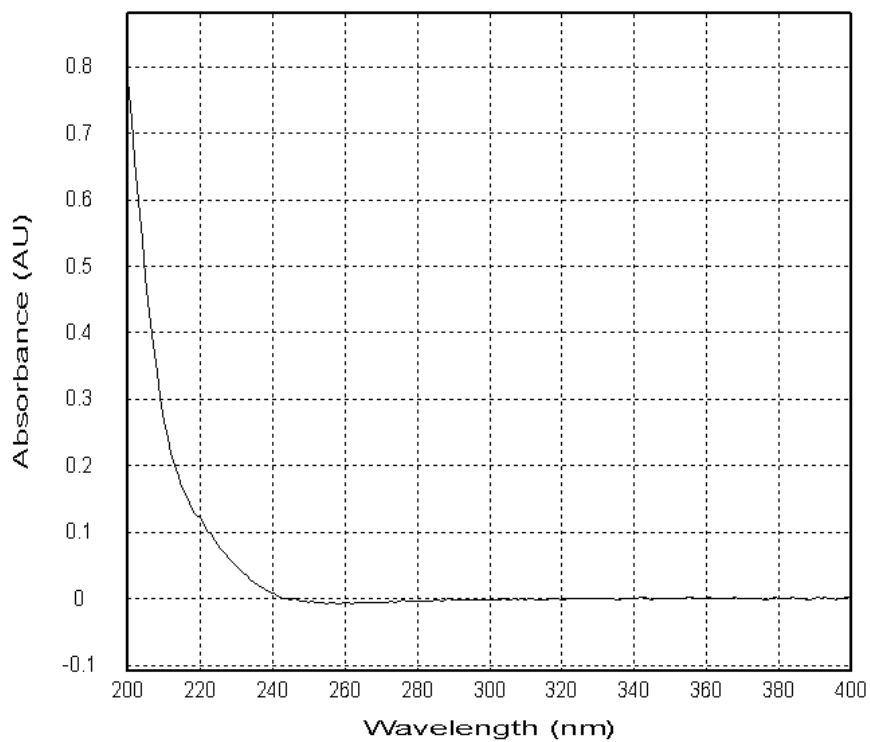

Figure S42. UV spectrum of 4

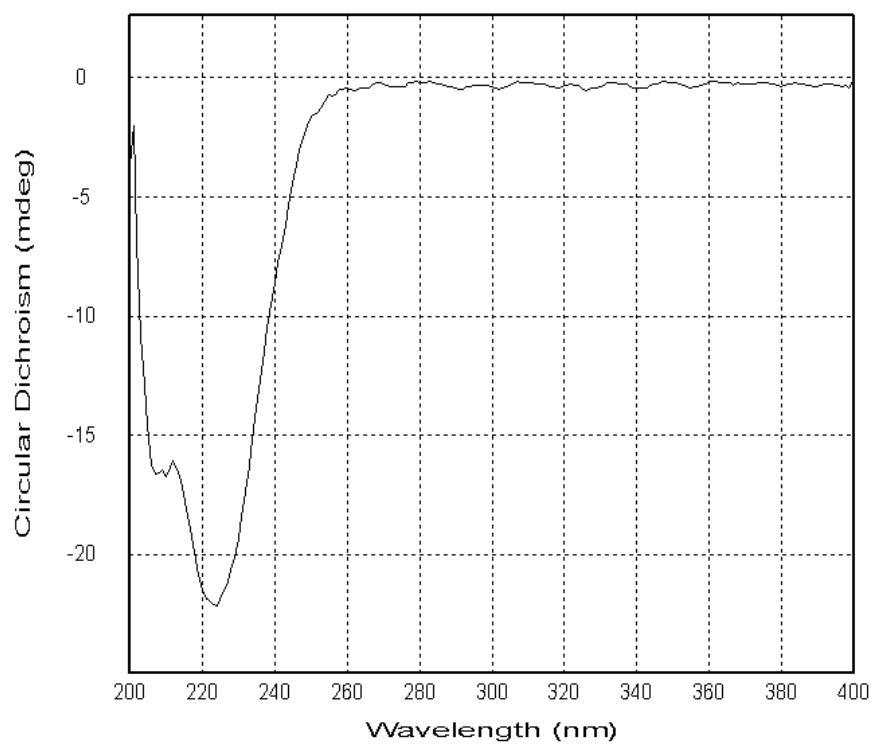

**Figure S43.** CD spectrum of **4**

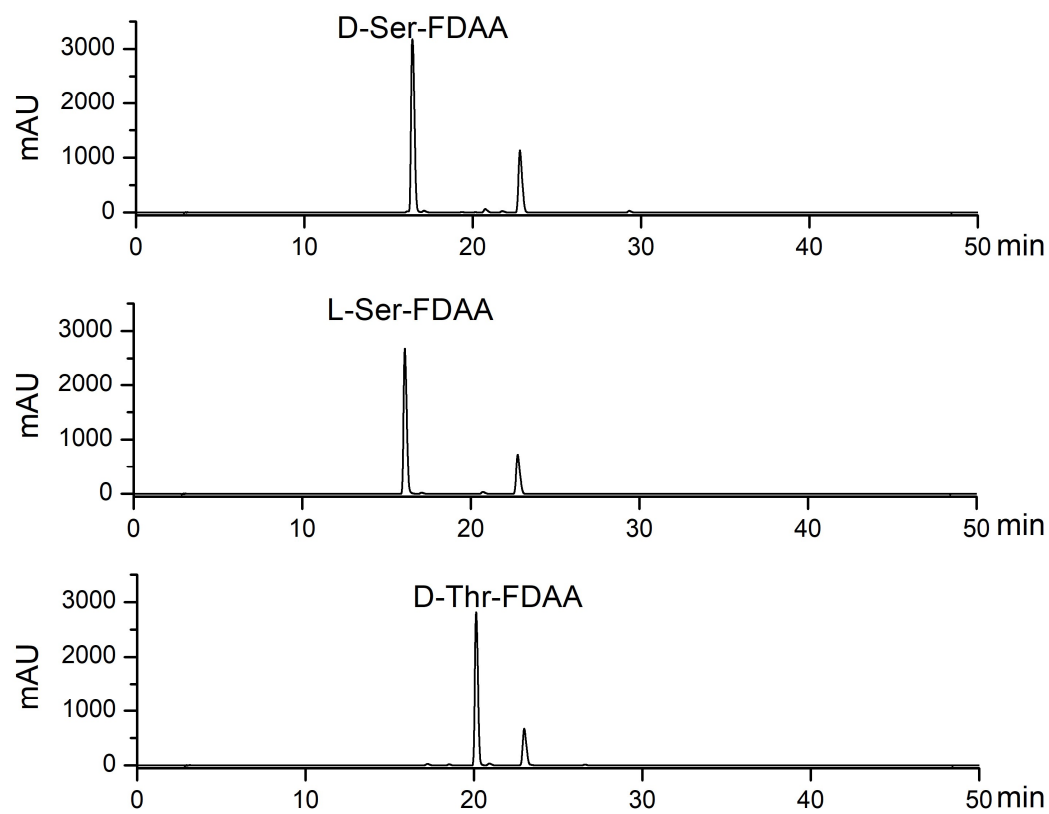

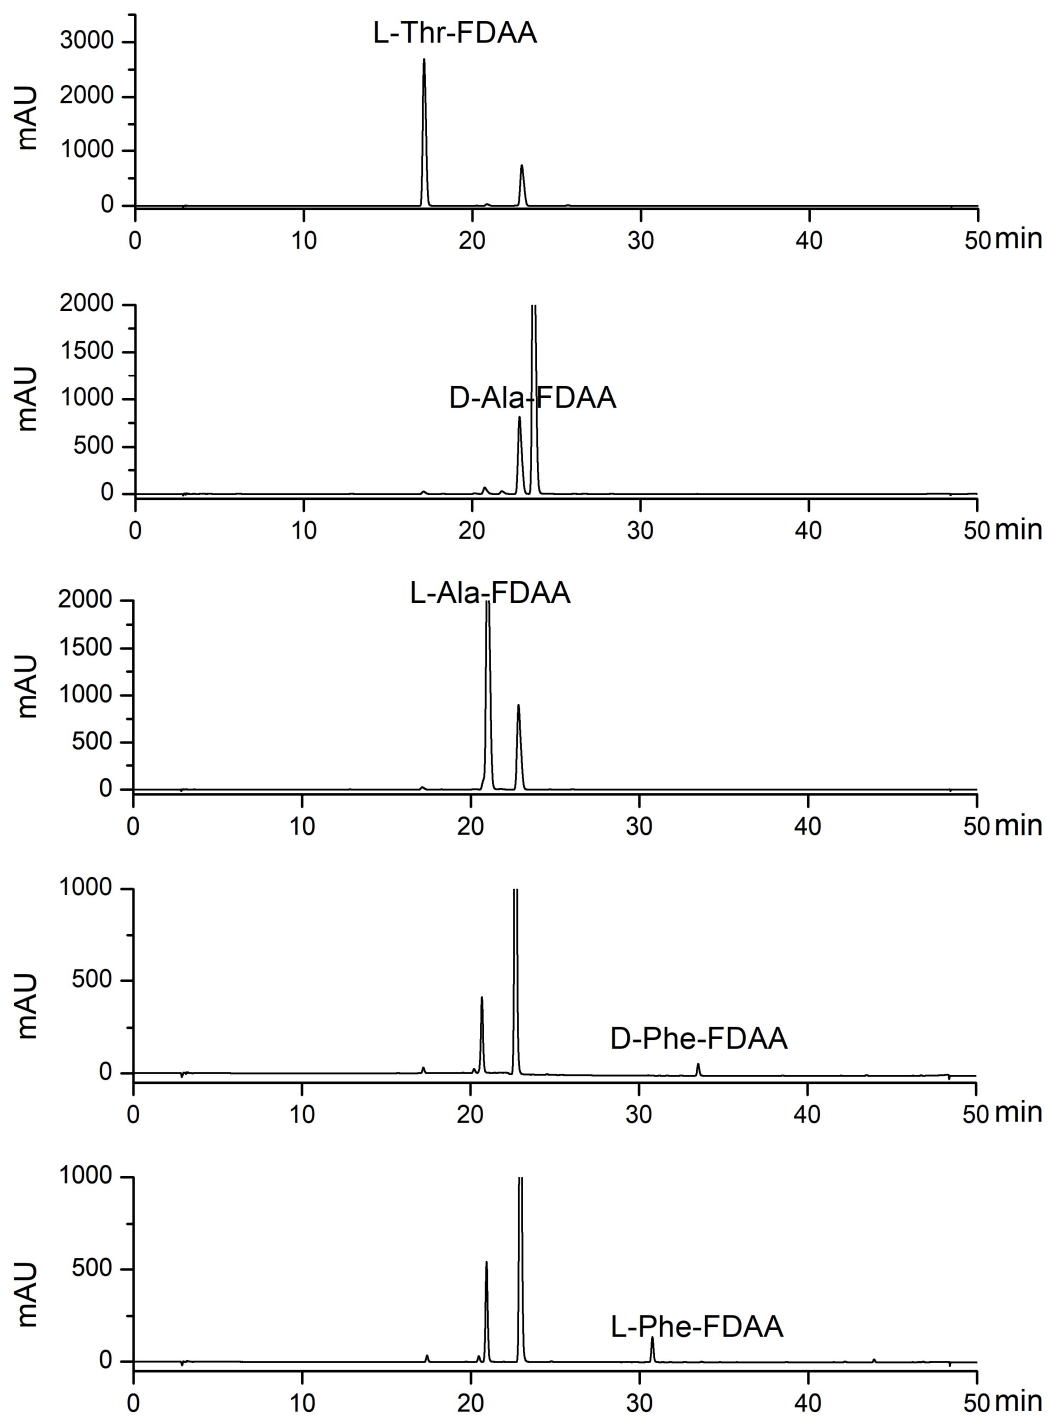

**Figure S44.** HPLC analysis of FDAA derivatives of standard amino acids (YMC-Pack ODS-A column, 250\*4.6 mm I.D., S-5  $\mu$ m, 12 nm).

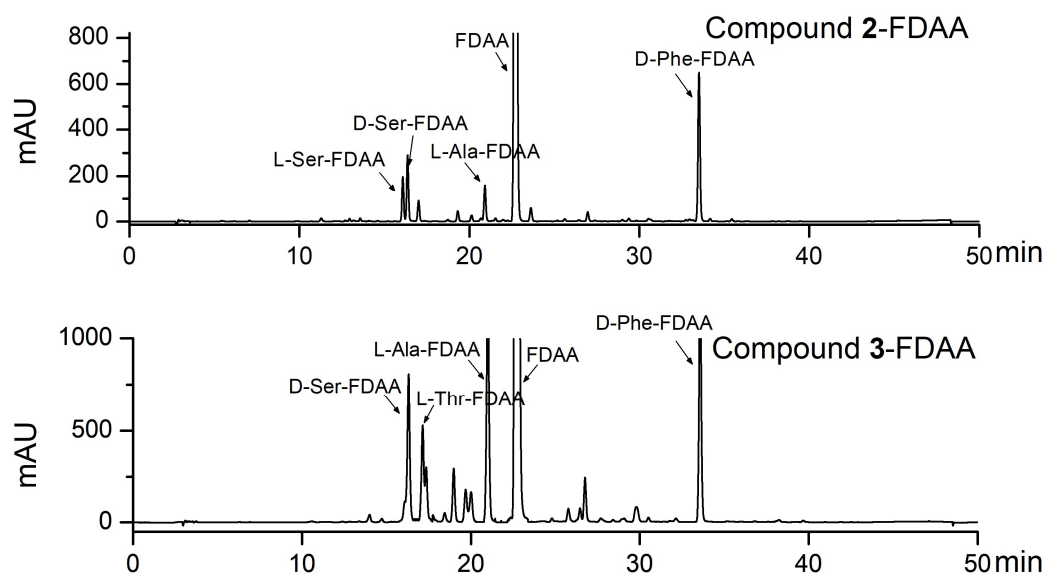

**Figure S45.** HPLC analysis of FDAA derivatives of compound **2** and **3** (YMC-Pack ODS-A column, 250\*4.6 mmI.D., S-5  $\mu$ m, 12 nm)

| Test concentration of 4 $\mu$ g/mL | Average OD |
|------------------------------------|------------|
| 100                                | 0.54       |
| 75                                 | 0.56       |
| 50                                 | 0.61       |
| 25                                 | 0.71       |
| 13                                 | 1.62       |

**Table S1.** Test concentration and OD value of compound **4** against AChE.

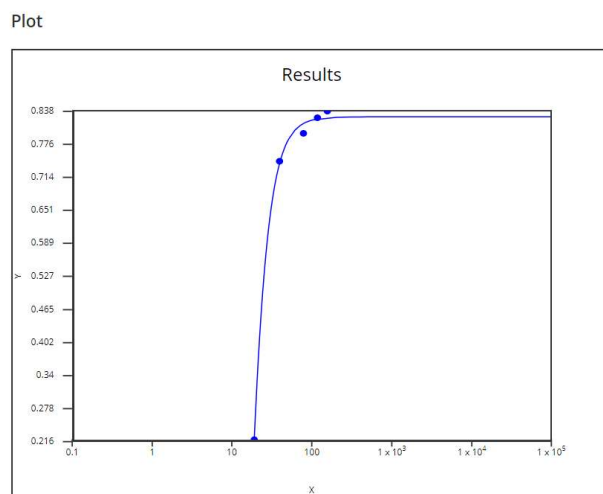

**Figure S46.** IC<sub>50</sub> curve of compound **4** against AChE.

| Test concentration | OD value of HONE1-EBV | Test concentration | OD value of HONE1 |
|--------------------|-----------------------|--------------------|-------------------|
| 50.000             | 0.400                 | 100.000            | 0.328             |
| 16.667             | 0.329                 | 33.333             | 0.305             |
| 5.556              | 0.528                 | 11.111             | 0.729             |
| 1.852              | 0.968                 | 3.704              | 0.880             |
| 0.617              | 1.074                 | 1.235              | 0.922             |
| 0.206              | 1.111                 | 0.412              | 1.066             |
| 0.068              | 1.092                 | 0.137              | 1.153             |
| 0.023              | 1.047                 | 0.046              | 1.020             |
| 0.008              | 0.997                 | 0.015              | 1.084             |
| 0.003              | 0.976                 | 0.005              | 1.021             |

**Table S2.** Test concentration and OD value of compound **4** against HONE1-EBV and HONE1.

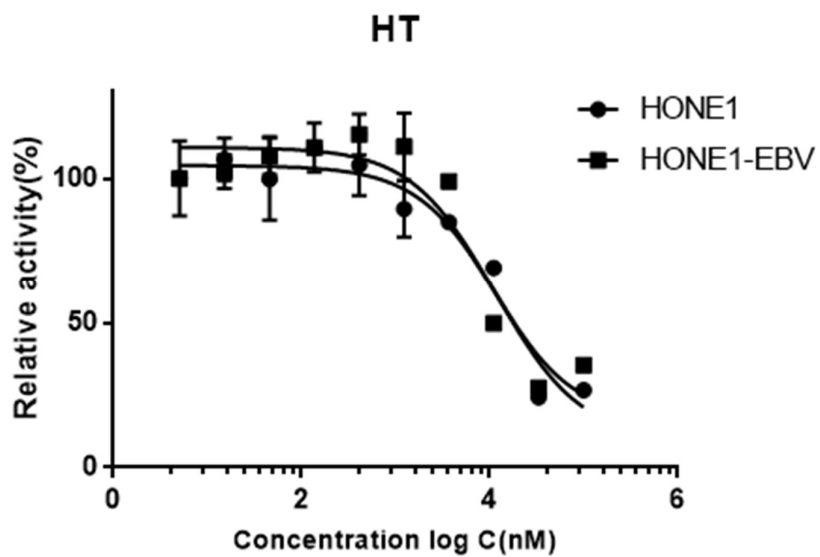

**Figure S47.** IC<sub>50</sub> curve of compound **4** against HONE1-EBV and HONE1.
